1 **A standardized gnotobiotic mouse model harboring a minimal 15-member**  
2 **mouse gut microbiota recapitulates SOPF phenotype**

3 Marion Darnaud<sup>1\*</sup>, Filipe De Vadder<sup>2</sup>, Pascaline Bogeat<sup>1</sup>, Lilia Boucinha<sup>1</sup>, Anne-Laure  
4 Bulteau<sup>2</sup>, Andrei Bunescu<sup>1</sup>, Julie Chaix<sup>1</sup>, Céline Couturier<sup>1</sup>, Ana Delgado<sup>1</sup>, Hélène Dugua<sup>1</sup>,  
5 Céline Elie<sup>1</sup>, Alban Mathieu<sup>1</sup>, Djomangan Adama Ouattara<sup>1</sup>, Séverine Planel<sup>1</sup>, Adrien Saliou<sup>1</sup>,  
6 Jennifer Yansouni<sup>1</sup>, Martin Schwarzer<sup>2,3</sup>, François Leulier<sup>1,2§</sup>, Andrea Tamellini<sup>1\*§</sup>

7

8 <sup>1</sup> BIOASTER, Institut de Recherche Technologique, 40 avenue Tony Garnier, 69007 Lyon,  
9 France

10 <sup>2</sup> Institut de Génomique Fonctionnelle de Lyon, Université de Lyon, Ecole Normale Supérieure  
11 de Lyon, Centre National de la Recherche Scientifique, Université Claude Bernard Lyon 1,  
12 Unité Mixte de Recherche 5242, 46 Allée d'Italie, 69364 Lyon, Cedex 07, France

13 <sup>3</sup> Laboratory of Gnotobiology, Institute of Microbiology of the Czech Academy of Sciences,  
14 Nový Hrádek, Czech Republic.

15

16 §Co-Senior authorship

17 \*Corresponding author: [gnotobiology@bioaster.org](mailto:gnotobiology@bioaster.org)

18

19 **Keywords:** Gnotobiology; minimal mouse gut microbiota; standardization; bacterial isolation;  
20 phenotype.

21

22

23

24

25 **Abstract**

26

27 *Mus musculus* is the classic mammalian model for biomedical research. Despite global efforts  
28 in standardizing breeding and experimental procedures, the undefined nature and inter-  
29 individual diversity of laboratory mouse microbiota remains a limitation. In an attempt to  
30 standardize preclinical studies, we have developed a simplified mouse microbiota composed  
31 of 15 strains from 7 of the 20 most prevalent bacterial families representative of the fecal  
32 microbiota found in specific opportunistic- and pathogen-free (SOPF) C57BL/6J animals and  
33 derived a standardized gnotobiotic mouse model called GM15. GM15 recapitulates extensively  
34 the functionalities found in C57BL/6J SOPF microbiota metagenome and GM15 animals are  
35 phenotypically similar to SOPF. They even perform better in a model of post-weaning  
36 malnutrition. The GM15 model ensures an increased reproducibility and robustness of  
37 preclinical studies by limiting the confounding effect of microbiota composition fluctuation and  
38 offers new possibilities for research focusing on how the microbiota shapes host physiology in  
39 health and diseases.

40

## 41 **Background**

42 The intestinal microbiota is a complex and dynamic ecosystem largely composed of bacteria  
43 whose activity profoundly influences our health and diseases [1]. Advances in sequencing and  
44 analytical technologies coupled with improved computing tools have revolutionized the field of  
45 host-microbiota interaction [2]. These developments have provided an increased depth and  
46 accuracy in the study of intestinal microbial assemblages and activity for correlative studies  
47 with human health or disease traits. Despite these sophisticated descriptions of host-  
48 microbiome interaction phenomena, the underlying causal mechanisms remain largely elusive  
49 [3].

50 The use of model organisms plays a decisive role in the challenge to move from  
51 correlation to causal links in the host-microbiome field as they have long enabled researchers  
52 to identify the shared biological functions among living organisms, and facilitated the discovery  
53 of conserved molecular mechanisms governing the fundamental principles of biology [4].  
54 Thanks to its genetic and physiological similarities to humans, in addition to its rapid and prolific  
55 breeding, the mouse has been a classic mammalian model of choice for the past decades for  
56 biomedical research and the host-microbiome field is no exception [5]. While the use of defined  
57 genetic backgrounds, as well as the absence of specific pathogens [6] is now common practice  
58 in mouse studies, an important confounding factor is the variability in the composition of the  
59 intestinal microbiota among experimental animals and animal facilities [7,8]. This parameter is  
60 under the influence of multiple elements such as genetics, diets, biological rhythms and  
61 breeding conditions [9]. As a consequence, to restrain microbial diversity, efforts have been  
62 made to tailor protocols for microbiota-related mice studies and to standardize mouse  
63 microbiota composition [9, 10, 11, 12, 13].

64 The mouse gut microbiota richness is usually estimated at more than 300 bacterial  
65 genera [5] and common inhabitants of the mouse intestine belong to seven bacterial phyla with  
66 *Firmicutes*, *Bacteroidetes* and *Proteobacteria* being the most abundant ones [12, 14, 15]. The  
67 first attempt in standardizing the mouse microbial environment (initially to study  
68 immunocompromised mouse models) arose 15 years ago with the wide implementation of the

69 Specific Pathogen-Free (SPF) hygienic status of mouse husbandries [6] by re-deriving mouse  
70 strains by two-cell-stage embryo transfer to SPF recipients and subsequent post-natal  
71 inoculation with a cocktail of bacteria devoid of pathogens to homogenize microbial  
72 colonization among a given animal facility. SPF, and then SOPF inbred lines (lacking Specific  
73 Opportunist Pathogens, such as *Staphylococcus aureus* or *Pseudomonas aeruginosa*) now  
74 represents the common standard health status for experimental mouse breeding. However,  
75 despite the global efforts in standardizing the SPF procedures, the undefined nature and  
76 important inter-individual diversity of the SPF microbiota remains a limitation in host-  
77 microbiome studies, since the scientific community still lacks a common SPF standard cocktail  
78 and rather use a facility-specific cocktail of bacteria [9]. Indeed, the microbiota fluctuates a lot  
79 with diet and environment, so it is strictly impossible to have the exact same microbiota of SPF  
80 mice in two different facilities.

81 Microbial cultivation and gnotobiology offer attractive strategies to standardize the  
82 microbiota of mouse models. Germ-Free (GF) animals (i.e. animals devoid of any living micro-  
83 organisms) are the originators of gnotobiotic animals (i.e. animals with a controlled microbiota)  
84 obtained by colonization with pure culture or cocktails of bacterial strains [16]. Recent efforts  
85 have been put into isolating, cultivating and archiving isolated culture of the dominant members  
86 of the mouse microbiota [17]. Gnotobiotic animals can be kept in isolators for several  
87 generations and offer the possibility of a strict control of their microbial status. Gnotobiotic  
88 models offering different degree of microbial complexity have been developed in the past  
89 ranging from mono-colonization (monoxenic animals) to high diversity microbiota models such  
90 as conventionalized ex-GF animals using a donor microbiota [9, 12, 18]. Two models have  
91 emerged for breeding and long-term experimental purpose: the Altered Schaedler Flora (ASF)  
92 model and the recent oligo-Mouse-Microbiota<sub>12</sub> (oligoMM<sub>12</sub>) model [19, 20]. These models offer  
93 an enlarged microbial potential as compared to monoxenic mice, while keeping the model  
94 simple and experimentally tractable as compared to conventionalized animals (SPF or SOPF).

95 The ASF was developed in the late 70s by adding bacterial strains which better  
96 represented the microbiota of conventional mice to the initial Schaedler flora, a minimal

97 microbial consortium that protected ex-GF mice from opportunistic pathogen colonization  
98 during breeding [21]. The ASF is composed of 8 defined bacteria, which are stable over mouse  
99 generations. Mice colonized with ASF display a certain degree of immune normalization when  
100 compared with SPF mice [19]. Limitations of the ASF model are that the strains are not publicly  
101 available of the strains and that they are not all representative of the dominant members of the  
102 mouse microbiota [9, 12]. In addition, ASF mice differ substantially from SPF mice with respect  
103 to microbiota-associated traits beyond immune parameters and resistance to opportunistic  
104 pathogen colonization, probably owing to the limited phylogenetic diversity and metabolic  
105 capabilities of the ASF consortium [9, 12, 22]. Recently, the oligoMM<sub>12</sub> model was developed  
106 [20]. It is a minimal microbiota gnotobiotic model composed of 12 defined cultivable mouse  
107 commensal bacteria from the miBC collection representing members of the major bacterial  
108 phyla of the mouse gut [17, 23, 24]. The community is transmissible and stable over  
109 consecutive mouse generations and unlike ASF offers colonization resistance against  
110 *Salmonella enterica* serovar Typhimurium albeit not to the degree of a conventional complex  
111 microbiota [20]. However, how the oligoMM<sub>12</sub> model performs relative to the SPF for  
112 microbiota-associated traits beyond *S. Typhimurium* colonization resistance remains elusive.

113 In an attempt to standardize preclinical studies in the host microbiome field, we have  
114 developed a simplified mouse microbiota that is representative of SOPF microbiota at the  
115 functional level and derived a standardized gnotobiotic mouse model called GM15, which  
116 phenotypically mimics SOPF mice under standard diet conditions. We show that, under  
117 conditions of chronic physiological stress such as post-weaning malnutrition on a low-protein  
118 diet, a dietary condition triggering stunting, GM15 microbiota seems superior to an SOPF  
119 microbiota to buffer the deleterious effect of a depleted diet on mouse juvenile growth.

120

## 121 **Results and Discussion**

122 ***In silico* identification of the main bacterial families of the C57BL/6J SOPF fecal**  
123 **microbiota**

124 To define a minimal microbiota containing representative and prevalent bacteria from the gut  
125 of C57BL/6J SOPF mice, we analyzed the composition of fecal pellets from 4 C57BL/6J SOPF  
126 mice (two females and two males) by whole-genome sequencing. An average of 13.4 million  
127 of paired-end reads was obtained per sample with a length of 300 bp. The metagenomics data  
128 sets generated were classified using the Centrifuge software [25] and compared to the RefSeq  
129 complete genome database [26], and 20 dominant families consistently present in all mice  
130 were identified (Fig. 1a). The profiling of metagenomic sequencing data pointed out a  
131 comparable distribution of bacterial families among the four tested C57BL/6J SOPF mice.  
132 Moreover, bacterial species identification was possible for genome sequences with good  
133 phylogenetic resolution and already referenced in taxonomy databases. Interestingly, among  
134 the identified species, *Bacteroides acidifaciens*, *Clostridium cocleatum*, *Lactobacillus*  
135 *johnsonii*, *Lactobacillus murinus* and *Lactobacillus reuteri* were previously identified as mouse-  
136 enriched and dominant intestinal bacteria [17] and *Lactobacillus murinus*, *Parabacteroides*  
137 *goldsteinii*, *Clostridium* ASF 356 and *Clostridium* ASF 502 were already part of the ASF model  
138 [19].

139

#### 140 **Isolation and taxonomic characterization of GM15 bacterial strains**

141 We established four different strategies in order to isolate and culture a maximal number of  
142 representative strains of the 20 dominant bacteria families identified in our metagenomic  
143 sequencing analysis (Fig. 1b). First, we isolated the most prevalent strains from fecal pellets  
144 of C57BL/6J SOPF mice using non-selective agar media. Then, we used antibiotic selection  
145 to isolate resistant strains. We also used rumen enrichment to isolate strains from caecal  
146 content. Finally, we used fecal pellets of ASF mice to isolate additional strains. We obtained a  
147 collection of approximately 400 cultivable bacterial isolates. All isolates were pre-screened by  
148 MALDI-TOF MS for dereplication prior to the first taxonomic identification by 16S rRNA gene  
149 Sanger sequencing. We selected eleven strains covering seven of the most representative and  
150 prevalent families of the intestinal microbiota of C57BI/6J SOPF mice and obtained four  
151 additional strains from the DSMZ miBC collection to establish the GM15 consortium that covers

152 most of the dominant bacteria families found in C57Bl/6J SOPF animals (Fig.1a,b). In  
153 summary, GM15 is composed of two strains of Bacteroidaceae, one strain of Tannerellaceae,  
154 six strains of Lachnospiraceae, three strains of Lactobacillaceae, one strain of  
155 Erysipelotrichaceae, one strain of Ruminococcaceae, and one strain of Enterobacteriaceae  
156 (Additional file 1: Figure S1). The genomes of the fifteen strains were sequenced and the draft  
157 genomes sequences aligned against the NCBI database [27], which allowed the identification  
158 of 14 strains at the species level and 1 strain at the family level.

159

### 160 ***In silico* functional metagenomics analysis of the GM15 strains**

161 To gain insights into the functionalities encoded in the individual genomes of the GM15  
162 members, the coding sequences of the 15 strains were converted into their respective protein  
163 sequences, which were annotated for clustering into KO (KEGG Orthology) groups. By  
164 merging the 15 assembled individual genomes, we found that the GM15 metagenome  
165 possesses 3890 non-redundant KO groups. Besides, all GM15 strains possessed 3 to 64  
166 unique functions, although *E. coli* Mt1B1 exhibited a vast repertoire of unique KO groups (10<sub>3</sub>),  
167 indicating that *E. coli* Mt1B1 is responsible for the GM15's functional metagenomic profile at  
168 33%, while the 14 other strains contribute all together at 8% and the 59% remaining are  
169 associated to non-unique KO groups (Fig. 1c). It is noteworthy that KEGG module analysis is  
170 biased towards gene sets, pathways and functional groups of well-characterized bacteria such  
171 as *E. coli*, which is by far the most studied bacterial species to date.

172 Next, we highlighted the *in silico* functionalities of the 15 selected strains associated  
173 with known enzymatic activities in the gut [28] (Fig. 1d). Again *E. coli* Mt1B1 is a major  
174 contributor, but each functionality is also covered by other strains at equivalent or lower levels.  
175 As expected, the enzymatic activities in the gut are correlated with the phylogenetic  
176 membership of the strains. For example, Lactobacilli, which are a major part of the lactic acid  
177 bacteria group, the principal contributor to lactate dehydrogenase [29], clustered together.  
178 Additionally, Lachnospiraceae clustered with Ruminococcaeae and Erysipelotrichaceae,  
179 which include mainly bacteria with sporulation capabilities [30, 31, 32]. Finally, Bacteroides

180 clustered with Parabacteroides, whose species are predominant in the colonic mucus barrier  
181 and promote mucinase activity [33], and are significant producers of succinate, a major  
182 metabolic by-product [34, 35]. Thus, different strains of a bacteria family and of other closely  
183 related bacteria families are capable of the same enzymatic activities in the gut. This can be  
184 essential for the generation of simplified non-specific gnotobiotic models.

185 Then, we determined the functional coverage of the GM15 metagenome (i.e. the sum  
186 of the genomes of the 15 strains) relative to the KEGG modules of C57BL/6J SOPF mouse  
187 microbiota found in our initial metagenomic analysis (Fig.1a). In addition, the KEGG modules  
188 from the OligoMM<sub>12</sub> and ASF microbiota were included for comparative analysis, as these  
189 consortia were previously used to generate gnotobiotic mice with a stable and defined mouse-  
190 derived microbiota [23, 36]. The presence and completeness of KEGG modules was  
191 determined for each metagenome and used for hierarchical clustering (Fig. 1e). One cluster  
192 contained highly conserved modules in all mouse models (Fig. 1e, cluster 4; Additional file 3:  
193 Table S2), including 140 pathways. We also identified clusters of modules that were not  
194 represented among the ASF and OligoMM<sub>12</sub> consortia, but specifically common to GM15 and  
195 SOPF (Fig. 1e, clusters 9 and 6; Additional file 3: Table S2), comprising a total of 155 pathways  
196 indicating that qualitatively the GM15 metagenome covers functionalities found in SOPF  
197 microbiota that were lacking in ASF and OligoMM<sub>12</sub> models. Quantitatively, the defined  
198 consortia of GM15, OligoMM<sub>12</sub> and ASF covered respectively 72, 54 and 48% of the KEGG  
199 modules of the C57BL/6J SOPF microbiome suggesting a superior functional potential of the  
200 GM15 community as compared to OligoMM<sub>12</sub> and ASF models. Thus, taken collectively our *in*  
201 *silico* analysis suggests that the GM15 community carries a significant potential for enzymatic  
202 activities in the gut and recapitulates widely the functionalities found in C57BL/6J SOPF murine  
203 metagenome.

204

### 205 **Monitoring and stability assessment of GM15 gut microbiota**

206 To explore *in vivo* the functional potential of the GM15 community, we next generated GM15  
207 isobiotic animals. First, we investigated whether the GM15 consortium can stably colonize the



208 mouse intestine over several generations. To this end, we developed a strain-specific  
209 quantitative polymerase chain reaction (qPCR) microfluidic assay, which allows simultaneous  
210 absolute quantification of the 15 strains, along with the global bacterial load in a given biological  
211 sample (Additional file 2: Table S1). Fecal samples from GF and SOPF mice were used as  
212 negative and positive controls. Only *C. clostridioforme* YL32, which was obtained from the  
213 DSMZ miBC collection, was not detected in our SOPF mice. Co-monitoring of specific and total  
214 bacteria aimed to detect any bacterial load imbalance caused by a contamination in gnotobiotic  
215 isolators.

216 Eight-week-old GF mice (five breeding pairs; GM15 founders, F0; Additional file 4:  
217 Figure S2) were inoculated by oral gavage with the frozen mixtures of the 15 strains and bred  
218 in sterilized positive pressure isolators up to the F4 filial generation. All strains except  
219 *Lachnospiraceae* bacterium COE1, *Lachnospiraceae* sp. MD329, and *Lachnospiraceae* sp.  
220 MD308 were above the detection limit of our qPCR microfluidic assay in the fecal samples of  
221 most individual mice (GM15 founders and progenies from the 4 consecutive generations;  
222 Additional file 5: Figure S3a; Fig. 2a). *Anaerotruncus colihominis* JM4-15, *Clostridium* ASF  
223 356, *Clostridium* ASF 502, and *Clostridium cocleatum* I50 were occasionally below detection  
224 limit. The detection of strains was reproducible between fecal and caecal samples from  
225 individual mice of the second filial generation (Additional file 5: Figure S3b). These results  
226 indicate a stable colonization and effective vertical transmission of at least 12 strains out of the  
227 15 inoculated. Based on the results of our qPCR assay, we consider that the 3 remaining  
228 strains: *Lachnospiraceae* bacterium COE1, *Lachnospiraceae* sp. MD329, and  
229 *Lachnospiraceae* sp. MD308, either did not efficiently colonize the animals, live in the caecum  
230 or the colon below the detection limit of our qPCR assay, or predominantly live in other  
231 gastrointestinal niches than those sampled.

232 Next, we evaluated the effect of aging on the GM15 community by following individual  
233 mice of the first filial generation between 2 and 12 months of age (Additional file 4: Figure S2).  
234 Overall, no changes in the qualitative and quantitative composition of the GM15 consortium  
235 were detected (Fig. 2b). Then, we asked if the composition of the GM15 community was

236 modulated by substituting the breeding diet by an alternative maintenance diet. This alternative  
237 diet is quasi isocaloric but its nutritional composition differs by 1.3 and 1.6-fold fewer proteins  
238 and lipids respectively, and 1.2-fold more carbohydrates than the breeding diet. An alternative  
239 diet was administrated to 8-week-old GM15 mice for 4 weeks. We collected fecal samples  
240 before diet change, after 2 and 4 weeks, and again after 4 weeks back to the breeding diet  
241 (Additional file 4: Figure S2). We did not detect any significant changes in the GM15  
242 composition under these conditions (Fig. 2c). Additionally, successful fecal microbiota  
243 transplantation (FMT) from GM15 founders to GF mice was confirmed by strain-specific qPCR  
244 of the ex-GF mice' feces collected at week 1, 2 and 3 post-transplantation (Additional file 4:  
245 Figure S2a; Fig. 2d).

246 When all the data are analyzed together (Fig. 2e), we notice a limited fluctuation  
247 (maximum 1Log<sub>10</sub>-fold change) of each member of the GM15 gut microbiota's load among  
248 the conditions tested (Fig. 2e). Therefore, we conclude that the GM15 community is stable  
249 upon adult colonization, among filial generations, during aging, upon mild dietary fluctuations  
250 and can be transmitted efficiently by FMT.

251

### 252 **The GM15 microbial community recapitulates SOPF macroscopic phenotype**

253 GF and published gnotobiotic mice display anatomical alterations compared to SOPF mice,  
254 such as enlarged caecum, along with physiological and metabolic differences [20, 37]. To  
255 phenotypically assess the gnotobiotic GM15 model, we designed a comparative study to  
256 evaluate the steady state macroscopic, immune, metabolic and endocrine phenotypes of GF,  
257 SOPF and GM15 mice. In addition, all phenotyping was achieved across two generations, F1  
258 and F2, to strengthen data analysis.

259 Initially, we evaluated the reproduction performance of the GM15 model by recording  
260 the period from mating to offspring delivery (Fig. 3a), the number of pups per litter (Fig. 3b),  
261 and the perinatal mortality (Fig. 3c). GM15 mice behaved like SOPF mice with the exception  
262 of one less progeny per mean litter. Then, we quantified the food intake relative to body weight  
263 after weaning at 4 weeks of age and observed no significant difference between the three

264 groups despite a marked increased variation among GF animals which is not detected in GM15  
265 and SOPF animals (Fig. 3d). Next, we studied post-natal growth parameters. Male and female  
266 GM15 animals gained weight (Fig. 3e) and size (Fig. 3f) like SOPF mice, although the growth  
267 curves from the two sexes differ. We then studied internal organ size. As expected, the  
268 characteristic caecum enlargement seen in GF animals was reduced in GM15 mice (Fig. 3g).  
269 The weights of GM15 and SOPF brain, liver and spleen were equivalent and larger than those  
270 of GF mice (Fig. 3g). Bone size was also identical in GM15 and SOPF mice and larger than  
271 that of GF mice (Fig. 3h). Taken together, these results confirm that the gut microbiota is  
272 associated with somatic tissue growth [38, 39], and that the GM15 simplified microbiota is  
273 sufficient to largely recapitulate the breeding and growth performance of SOPF mice by  
274 compensating the physiological limitations of GF mice.

275

#### 276 **The GM15 simplified microbiota partially restores SOPF immune phenotype**

277 It is now well established that host-specific bacteria consortia influence intestinal and systemic  
278 immune maturation [40, 41]. We thus profiled the basal immune parameters of GM15 animals  
279 and compared them to SOPF and GF animals at 7-8 weeks of age. We observed that the  
280 GM15 community induces the production of IgA in the gut and in serum at levels equivalent to  
281 those detected in SOPF mice (Fig. 4a). Notably, the highest levels of circulating IgA were not  
282 correlated with the highest levels of fecal IgA, and intragroup variability was not related to gut  
283 microbiota composition, which was homogeneous between individuals. Additionally, IgG2b  
284 serum levels were equivalent in GM15 and SOPF mice compared to GF mice, IgG3 levels  
285 were increased in GM15 mice compared to GF and SOPF mice, and IgM levels were slightly  
286 increased in GM15 mice compared to SOPF (Fig. 4a), which was consistent with published  
287 comparative analyses carried out with SPF mice even though IgG3 and IgM levels were lower  
288 in our SOPF mice [42, 43]. On the other part, no difference of circulating IgG1 was observed  
289 between GF, GM15 and SOPF, and all IgG2a levels were below levels of detection (data not  
290 shown). Surprisingly, GM15 mice presented elevated levels of IgE in serum compared to GF  
291 and SOPF mice (Fig. 4a). High IgE levels may result from parasitic infections, or

292 immunodeficiencies and long-lived IgE producing plasma cells generated by food antigens in  
293 mice with low-diversity microbiota during early life [42, 44, 45]. Independent tests following  
294 FELASA guidelines (CR EU RADS, France) rejected the infection hypothesis of the GM15  
295 mice, which were negative for ectoparasites and endoparasites, respiratory and intestinal  
296 specific pathogenic bacteria and infectious agents, as well as viruses. It is also known that  
297 Clostridia-abundant juvenile mice have lower IgE levels [46]. Of note, our GF mice do not show  
298 increased IgE levels as SOPF, and GM15 mice harbor a similar load of Clostridia as SOPF  
299 despite elevated levels of IgE. Therefore, we speculate that specific members of the GM15  
300 consortium are inducers of the observed high IgE titer.

301         Next, we assayed the circulating levels of key intestinal cytokines IL-17a and IL-22,  
302 whose production is induced by commensal bacterial via TLR2 activation in the gut mucosa  
303 [47], and linked to local inflammation [48, 49] or associated with anti-microbial responses and  
304 control of bacterial colonization [50, 51]. GM15 microbiota induced release of both cytokines  
305 compared to GF mice (Fig. 4b) and in a similar manner to SOPF mice for IL-22. To note, serum  
306 IL-17a concentrations in our SOPF mice detected by Luminex were slightly lower than those  
307 published for SOPF animals in previous studies using Luminex detection, but do not explain  
308 the difference observed between GM15 and SOPF mice levels [52]. We also measured IL-1b,  
309 IL-10, IL-12p70, and IL-17f, which are cytokines involved in autoimmune and inflammatory  
310 bowel diseases, but we did not detect any difference between the three groups of mice.

311         In parallel, we assessed viable leukocytes by measuring CD45+ cell counts and  
312 analyzed T cells, B cells, NK cells and monocytes or dendritic cells (DC) populations in whole  
313 blood and several lymphoid organs (spleen, thymus, Peyer's patches (PP) and mesenteric  
314 lymph nodes (MLN)). It has been previously shown that isolated lymphoid structures such as  
315 PP and associated cellularity were strongly increased with microbiota diversity whereas the  
316 total cell numbers in MLN were comparable between GF and SPF mice [53]. As described in  
317 literature, the number of PP collected were higher in SOPF mice compared to GF and partially  
318 restored in GM15 mice (data not shown), and no or minor difference were observed between  
319 the 3 groups for CD45+ cells count that showed slight increased levels in SOPF compared to

320 GF mice with apparent intermediary levels in GM15 mice in spleen, thymus and PP, and no  
321 difference in MLN (Fig. 4c). ]. In 2018, Kennedy *et al.* published an overview of the literature  
322 describing the main immune cell populations modifications observed in GF mice in different  
323 organs [54]. In our study, very few immune cell populations seemed to be impacted by flora  
324 composition. No difference between the 3 groups was observed for MLN DC, circulating and  
325 splenic CD4+ and CD8+ T cells and splenic B cells as described in literature (data not shown).  
326 Minor differences were observed for PP CD4+ T cells and splenic DC between GM15 mice  
327 and SOPF but not with GF mice whereas both populations were described to be decreased in  
328 GF mice (Additional file 6: Fig. S4b/e). Only PP NK cells showed similar and increased levels  
329 in GM15 and GF mice compared to SOPF mice (Additional file 6: Fig. S4e). Interestingly, the  
330 great majority of populations impacted showed similar levels in GM15 mice and SOPF  
331 compared to GF mice (Additional file 6: Fig. S4a-e). Circulating monocytes, MLN CD8+ T cells  
332 and splenic NK cells were increased in GM15 and SOPF compared to GF as described in  
333 literature for circulating monocytes and MLN CD8+ T cells and though splenic NK cells were  
334 not described to be modified in GF mice. Thymic CD4+ T cells, circulating and MLN B cells  
335 were decreased in GM15 and SOPF mice compared to GF though circulating B cells were  
336 described to be decreased in GF mice.

337 Taken collectively, our results indicate that the GM15 community is sufficient to dampen  
338 the characteristic immunodeficiencies of GF animals and restore an immunophenotype close  
339 to that detected in SOPF animals with a peculiar signature of the GM15 model with high IL17a  
340 and IgE levels in sera. To note, no correlation was observed between those two markers in  
341 our study although positive or negative correlations have been both described in literature [55,  
342 56, 57, 58]. Furthermore, as for IgE, IL-17a levels modulations have been described to be  
343 associated to particular flora compositions [42, 59, 60, 61, 62, 63, 64, 65, 66, 67]. Such an  
344 observation paves the way to further investigation to decipher which and how members of the  
345 GM15 community trigger these immunophenotypes.

346

347 **Low-complexity GM15 microbiota shares more metabolic traits with SOPF than GF mice**

348 The gut microbiota influences multiple host metabolic pathways by providing metabolites to its  
349 host and also shapes inter-organ communication within the body by influencing the production  
350 and activity of endocrine signals [68, 69]. One-dimensional proton nuclear magnetic resonance  
351 spectrometry ( $^1\text{H}$  NMR) was previously applied to investigate how the gut microbiota impacts  
352 host metabolism using mouse models [70, 71], or human cohorts [72]. Using this technology,  
353 we analyzed the metabolic profile of plasma samples from GF, GM15 and SOPF mice and  
354 were able to quantify a total of 51 polar metabolites and 5 non-polar metabolites whose levels  
355 were not significantly affected by sex (Additional file 7: Table S3; Additional file 8: Table S4).  
356 A principal component analysis based on quantified polar metabolites showed sequential  
357 alignment on first principal component (8.8% of total variance) according to microbiota  
358 complexity of GF, GM15 and SOPF samples, independently of F1 and F2 generations (Fig.  
359 5a). The metabolic composition of GF plasma resulted only from the host metabolic activity  
360 and represented a basal phenotype. At the other end, the SOPF mice harboring a very diverse  
361 gut microbiota, exhibited a larger panel of metabolic activities based on host-bacterial and  
362 bacterial-bacterial interactions. In-between, the GM15 low-complexity community contributed  
363 in a lower extent to the metabolic phenotype. We performed the equivalent statistical analysis  
364 using binned NMR spectra instead of quantified metabolites and as expected we obtained the  
365 same results (Additional file 9: Figure S5). Next, we performed a discriminant analysis across  
366 all samples to highlight the specific metabolic signatures of each group. Eight metabolites  
367 emphasized significant variation, although it is noteworthy that the calculated distance placed  
368 GM15 closer to SOPF than to GF (Fig. 5b). As previously reported, GF mice had higher plasma  
369 levels of glycine [73] and reduced plasma acetate concentration [74]. On the contrary, SOPF  
370 mice harboring a diverse microbiota had higher plasma levels of acetate, acetoacetate and  
371 dimethyl sulfone [75]. As for GM15 mice, less methanol and more citrate, ethanol and pi-  
372 methylhistidine were detected. Interestingly, methanol may occur as a result of fermentation  
373 by gut bacteria and can stimulate citric acid fermentation [76, 77]. Thus, the simplified gut  
374 microbiota of GM15 mice may produce less methanol and/or microbially-produced methanol  
375 may be used to form citrate. On the other part, ethanol is produced by some intestinal bacteria,

376 such as *E. coli* and lactic acid bacteria, which are well represented in the GM15 community  
377 [78]. These specific metabolic signatures may be used in the future as a panel of biomarkers  
378 to identify the GM15 model. Besides, the analysis of the plasma non-polar metabolites  
379 indicated that GM15 colonization was sufficient to reduce free cholesterol and  
380 phosphatidylcholine as observed in SOPF mice (Fig. 5c). The three additional non-polar  
381 metabolites detected were equivalent in all mice (Additional file 8: Table S4).

382 Finally, we investigated the circulating levels of key metabolic hormones and growth  
383 factors. To allow blood sample mutualization for different analyses, mice were not fasted.  
384 Ghrelin was below limit of detection for all groups, and glucagon, insulin and leptin did not  
385 show any difference between GM15 and GF mice, whereas levels detected in SOPF mice  
386 were similar to those previously published under basal conditions [79, 80, 81] (data not shown).  
387 However, as compared to levels detected in GF animals the GM15 gut microbiota was able to  
388 restore the levels of circulating insulin growth factor 1 (IGF-1) as seen in SOPF animals. IGF-  
389 1 is an essential growth factor promoting systemic and tissue growth [82, 83] and this  
390 observation correlates well with the improved macroscopic growth of GM15 mice compared to  
391 GF animals (Fig. 5d, Fig. 3e-h). Corticosterone levels, which are high in GF and low in SOPF  
392 animals were also normalized by GM15 bacterial colonization [84] (Fig. 5e), indicating that  
393 GM15 community seems as efficient as a complex SOPF microbiota at utilizing host  
394 metabolites and promoting steroidogenesis and growth factor production.

395 Collectively, our results reveal that GM15 animals stand out from GF mice and  
396 recapitulate many of the SOPF metabolic features even though some differences exist.

397

### 398 **GM15 mice are less sensitive to diet-induced stunting than SOPF mice**

399 Previous work by our lab and others [85, 86, 38] has shown that the gut microbiota influences  
400 pathogenesis associated to chronic undernutrition, particularly diet-induced stunting.  
401 Consequently, we sought to study our newly-established gnotobiotic mouse model under a  
402 severe nutritional stress, induced by a macronutrient-depleted diet (containing 4% protein and

403 2% lipids) expected to trigger stunting. We thus fed male mice a breeding diet (BD) or a  
404 depleted diet (DD) from post-natal day 21 (i.e. the day of weaning) until post-natal day 56.

405 As shown in Fig. 6a-b and similarly to our previous observation (Fig. 3e-f) GM15 and  
406 SOPF mice grew well on the BD as they show similar body weight and size gains. Next, we  
407 confirmed that the DD triggered an almost full stunting of both the juvenile GM15 and SOPF  
408 mice, characterized by the flattening of their weight and size curves (Fig. 6a-b). However, the  
409 GM15 mice performed slightly better in terms of growth as both their body weight and size  
410 were significantly less impacted than SOPF animals by the DD. While the caecum of GM15  
411 was enlarged (Fig. 6c, Additional file 10: Fig. S6a), this variation could not account for the total  
412 weight difference between GM15 and SOPF animals. We thus compared the sizes and weights  
413 of nine other organs (Fig. 6d-f, Additional file 10: Fig. S6b-g) in order to account for these  
414 variations and using two-way ANOVA, we confirmed that diet was the main driver of the growth  
415 phenotype. However, we found that the increase in body size observed in GM15 mice on the  
416 DD could be correlated to a significant increase in the size of the tibia (Fig. 6d). Although we  
417 did not find any other significant difference in other single organ size or weight between GM15  
418 and SOPF animals on DD, we observed a clear tendency of an increase in GM15 compared  
419 to SOPF animals for most parameters tested (Fig. 6e-f, Additional file 10: Fig. S6b-g). We  
420 tested this tendency by integrating all the phenotypical parameters in a Principal Component  
421 Analysis (PCA). We first established which parameters were correlated to the phenotype  
422 (Additional file 10: Fig. S6h), thus excluding brown adipose tissue from the analysis as a non-  
423 correlating parameter. The PCA revealed that, under BD, the GM15 phenotype was part of the  
424 spectrum of the SOPF phenotype (Fig. 6g). However, under DD, there is a clear shift between  
425 the GM15 and SOPF phenotypical space (Fig 6g, dotted lines). Our results thus indicate that  
426 under nutritional stress, GM15 microbiota buffers diet-induced stunting slightly more effectively  
427 than an SOPF microbiota. As IGF1 is an important driver of the diet and microbiota mediated  
428 growth promotion [38], we assessed IGF1 levels in animals and while the levels massively  
429 drop in the DD conditions, we did not detect any difference between GM15 and SOPF mice at  
430 day 56 on the DD (Fig. 6h). However, we cannot exclude that slight variation in size between



431 GM15 and SOPF animals on DD results from a differential secretion of IGF1 before day 56,  
432 when the growth rate of the animal is maximal (Fig. 6a-b).

433 Taken together, our data show that animals bearing the simplified GM15 microbial  
434 community perform similarly than animal bearing a complex SOPF microbiota under non  
435 stressful conditions, however the GM15 microbiota seem partially protective against the  
436 deleterious effects of chronic undernutrition, as compared to SOPF mice.

437

### 438 **Conclusions and perspectives**

439 Here we describe GM15, a simplified and controlled murine gut microbiota and its related  
440 GM15 C57BL/6J gnotobiotic mouse model. The GM15 community is composed of pure  
441 cultures of 15 strains from 7 of the 20 most prevalent bacteria family present in the fecal  
442 microbiota of SOPF C57BL/6J mice. GM15 carries significant potential for enzymatic activities  
443 in the gut and recapitulates extensively the functionalities found in C57BL/6J SOPF gut  
444 microbiome. *In vivo* GM15 is stable upon adult colonization for up to 12 months, during natural  
445 transmission among 4 filial generations, upon mild dietary fluctuations and can be transmitted  
446 efficiently by FMT. GM15 compensates the steady state breeding, growth, immune, endocrinal  
447 and metabolic limitations of GF mice and recapitulates many of the SOPF phenotypical  
448 features. Taken together our results establish that GM15 is a novel controlled preclinical model  
449 phenotypically similar to SOPF with the potential to ensure an increased reproducibility and  
450 robustness of preclinical studies by limiting the confounding effect of microbiota composition  
451 fluctuation. Importantly, the reduced microbial complexity of the GM15 community, the  
452 tractability of its members and the control offered to the experimenter on its composition allow  
453 easy quantification of gut microbiota dynamics. Indeed, upon manipulation of the GM15  
454 community composition, the correlation of such dynamics with fluctuating host traits allows the  
455 establishment of causal relationships between specific microbiota members and host traits.  
456 GM15 model offers exciting perspectives for improvement. Indeed, under stressful nutritional  
457 environment, the simplified GM15 microbiota performs slightly better than a complex SOPF  
458 community in terms of physiological host response. We have previously identified a

459 *Lactobacillus* strain that is capable of buffering the deleterious effects of such challenge in  
460 monocolonized mice [38]. Interestingly, out of its 15 strains, GM15 microbiota contains 3  
461 *Lactobacillus* strains. Further genetic manipulations coupled to gnotobiotic studies focusing on  
462 modifying the Lactobacilli components of GM15 will pave the way to understanding how this  
463 minimal bacterial community buffers the host response to chronic undernutrition.

464 As all experimental models GM15 has its limitations. First, phenotypically, despite being  
465 macroscopically similar, GM15 and SOPF animals differ in specific immune and metabolic  
466 signatures. This is not particularly surprising given the marked reduced microbial diversity that  
467 the GM15 model carries compare to SOPF microbiota (15 strains vs hundreds of species in  
468 SOPF animals). These specific immune and metabolic signatures of the GM15 models pave  
469 the way to further studies aiming at defining if the presence or absence of specific community  
470 members triggers these phenotypes. Another limitation worth mentioning here is that the GM15  
471 model is a standardized model, and such standardization, essential for establishing robust  
472 causal relationships between a microbiota configuration and a host trait, may decrease the  
473 translational potential of the observation.

474 In addition, microbiota-mediated resistance to *Salmonella* infection may be tested in  
475 GM15 animals and compared to ASF and OligoMM<sub>12</sub> animals as recently done by Stecher and  
476 colleagues [20]. Second, the GM15 model, by its low complexity, offers the possibility to use it  
477 as a template for establishing further complex or complete consortia, e.g. by complementing it  
478 with representative strains of the missing prevalent bacteria family found in SOPF microbiota  
479 such as Deferribacteraceae, Oscillospiraceae, Clostridiaceae and Eubacteriaceae. Despite  
480 these limitations and room for improvement, our study establishes that the GM15 model offers  
481 new possibilities for preclinical research focusing on host-microbes and microbe-microbe  
482 interactions, and how the microbiota shapes the environmental impact on health and diseases  
483 or drug efficacy.

484

485

486

## 487 **Methods**

### 488 **Bacterial strains isolation and identification**

489 Fresh caecal contents and fecal pellets of C57BL/6J SOPF mice (Charles River Lab., France)  
490 were resuspended (1/10 wt/vol) in reduced broth media for direct dilution plating on agar plates  
491 and growth at 37°C under anaerobic atmosphere (90% N<sub>2</sub>, 5% H<sub>2</sub>, 5% CO<sub>2</sub>). *Lactobacillus*  
492 *johnsonii* NCC 533 was isolated on MRS agar. *Lactobacillus murinus* 313 and *Parabacteroides*  
493 *goldsteinii* WAL 12034 were isolated on Columbia CNA agar with 5% sheep blood. *Bacteroides*  
494 *acidifaciens* A40 and *Lachnospiraceae* sp. MD308 were isolated on GAM agar. *Bacteroides*  
495 *caecimuris* I48 and *Lactobacillus reuteri* I49 were isolated on GAM agar supplemented  
496 respectively with 32 µg/mL vancomycin and 32 µg/mL erythromycin. *Lachnospiraceae*  
497 bacterium COE1 and *Lachnospiraceae* sp. MD329 were isolated on M2GSC agar (modified  
498 Hobson, containing (per 100 mL) 1 g of casitone, 0.25 g of yeast extract, 0.4 g of NaHCO<sub>3</sub>,  
499 0.2 g of glucose, 0.2 g of cellobiose, 0.2 g of soluble starch, 30 mL of clarified rumen fluid, 0.1  
500 g of cysteine, 0.045 g of K<sub>2</sub>HPO<sub>4</sub>, 0.045 g of KH<sub>2</sub>PO<sub>4</sub>, 0.09 g of (NH<sub>4</sub>)<sub>2</sub>SO<sub>4</sub>, 0.09 g of NaCl,  
501 0.009 g of MgSO<sub>4</sub>·7H<sub>2</sub>O, 0.009 g of CaCl<sub>2</sub>, 0.1 mg of resazurin, and 1.5 g agar).  
502 *Lachnospiraceae* bacterium COE1, *Lachnospiraceae* sp. MD329, and *Lachnospiraceae* sp.  
503 MD308 were isolated from caecal contents, the rest from fecal pellets. Fecal pellets of ASF  
504 mice (Taconic, USA) were cryopreserved at -80°C, and then resuspended in reduced broth  
505 media for direct FMT in GF mice. Fresh caecal content and fecal pellets were resuspended in  
506 reduced broth media for direct dilution plating on agar plates and growth at 37°C under  
507 anaerobic atmosphere (90% N<sub>2</sub>, 5% H<sub>2</sub>, 5% CO<sub>2</sub>). *Clostridium* ASF356 and *Clostridium*  
508 ASF502 were isolated on M2GSC agar, respectively from caecal content and fecal pellets. For  
509 identification of isolates, colonies were pre-screened for dereplication by MALDI-TOF MS  
510 (Vitek MS, Biomérieux) according to the manufacturer's instructions and database enrichment  
511 using RUO mode. Then, gDNA was extracted from pure cultures and analyzed by 16S rRNA  
512 gene sequencing (GATC Biotech). Following Edgar's recommendation [87], a full-length 16S  
513 rRNA sequence similarity ≥99% using either NCBI blast [27], Ribosomal Database Project [88],  
514 or EzTaxon [89] programs allowed the identification of 13 isolates at the species level, and

515 isolates MD329 and MD308 could only be assigned to the *Lachnospiraceae* family. A more  
516 precise annotation could be given for the 2 isolates *Clostridium* ASF356 and *Clostridium*  
517 ASF502 obtained from the defined ASF microbial consortium. *Anaerotruncus colihominis* JM4-  
518 15 (DSM-28734), *Clostridium clostridioforme* YL32 (DSM-26114), *Clostridium cocleatum* I50  
519 (DSM-1551), *Escherichia coli* Mt1B1 (DSM-28618) were obtained from DSMZ.

520

### 521 **Culture conditions**

522 Freshly grown cultures of individual bacterial strains were supplemented with 20% glycerol  
523 prior cryopreservation at -80°C. Each culture was systematically validated for culture purity  
524 and identity by MALDI-TOF. Culture media and material were introduced in the anaerobic  
525 chamber at least 2 days before use. Anaerobic bacterial strains were grown in GAM, except  
526 *Clostridium* ASF502, *Lachnospiraceae* sp. MD308, *Lachnospiraceae bacterium* COE1 and  
527 *Lachnospiraceae* sp. MD329 in M2GSC, and *A. colihominis* JM4-15 in Bifidobacterium  
528 medium. For mouse colonization and absolute quantification of bacteria, a single colony of  
529 each of the 15 bacterial strains was grown and amplified at 37°C. Each bacterial pellet was  
530 resuspended in medium, 1 mL was cryopreserved with 10% glycerol, 1 mL was centrifuged  
531 and bacterial pellet was stored at -20°C for gDNA extraction, and the rest was used for  
532 numeration by dilution plating on agar plates. A frozen mixture of the GM15 bacterial  
533 community containing the 15 individual strains at equivalent concentration (6.67E+06 CFU)  
534 was prepared to enable easy inoculation.

535

### 536 **WGS**

537 DNA samples from the 15 bacterial cultures were prepared for whole-genome sequencing,  
538 using the Nextera XT DNA library preparation kit (Illumina, Cat.Nos. FC-XXX, California, USA)  
539 according to manufacturer's recommendations. The resulting libraries were checked for their  
540 quality using the High-sensitivity DNA chip using the Agilent 2100 Bioanalyzer (Waldbronn,  
541 Germany) and quantified using the QuantiFluor One dsDNA kit (Promega). Paired-end

542 (2x300bp) sequencing was performed on a MiSeq sequencer using the “MiSeq v3 kit (600  
543 cycles)” (Illumina, California, USA).

544

#### 545 ***De novo* genome assembly**

546 After a quality control with FastQC [90], the paired-end reads were assembled *de novo* using  
547 the “A5-miseq” assembly pipeline [91], comprising the following steps: adapter trimming,  
548 quality trimming and filtering, error correction, contigging and scaffolding. The 15 *de novo*  
549 assemblies resulted in draft genomes composed of few scaffolds (from 30 to 268) with high  
550 N50 values (from 13 099 to 943 892). Genomes were then ordered using Mauve [92] and  
551 annotated with PGAP of the NCBI database. Default parameters were used for all software tools.

552

#### 553 **Taxonomic annotation**

554 WGS generated data have been trimmed and quality controlled by AfterQC software [93]. A k-  
555 mer counting strategy with the Centrifuge software [25] have been privileged to infer taxonomy,  
556 and reads were confronted to the RefSeq complete genome database [26], with bacteria,  
557 archaea and viruses domains and the mouse representative genome (taxid 10090), in order  
558 to estimate the amount of host DNA contamination and remove it from sequenced data.

559

#### 560 **Genomic functional analysis**

561 Genes were predicted and turned into protein sequences using Prodigal [94]. Marker genes  
562 were searched using the HMM3 package [95]. Predicted proteins sequences of genomes were  
563 blasted against the KEGG microbial database [96] which contains 13 millions of proteins  
564 sequences and trimmed with following parameters: best-hit with an expected value threshold  
565  $< 10^{-5}$ . The matrix obtained was consolidated into KEGG orthologs count (KO, which  
566 represents a set of genes the have sequence similarities and do the same function), into KEGG  
567 modules (which represent short enzymatic pathways, involving few proteins and doing a  
568 targeted function), and into KEGG pathways (i.e. large metabolic pathways). KO were  
569 analyzed for their presence absence among genomes. The modules were analyzed for their

570 completion (4 levels: Full, lack 1 enzymes, lack 2 enzymes, absent), and only modules with a  
571 score with 3 or 4 were presented and integrated for their KO count. The KEGG pathways were  
572 analyzed for their number of related KO count affiliated to them. A list of functions of interest  
573 have been designed and their presence among genomes have been analyzed in details  
574 (Additional file 3: Table S2). Because pathways and functions of interest did not have the same  
575 number of KO of interest and a different distribution among the genomes, functional data were  
576 normalized among each function in order to obtain values that can be comparable. For each  
577 function/pathway, the number of different KO was normalized by the total number of KO  
578 retrieved. Data were then log-transformed +1. Clusterization of both functions and communities  
579 was performed using Euclidian distance and ward's method, and a kmeans clustering was  
580 performed in order to define the community clusters.

581

#### 582 **Identification of specific regions for primers design**

583 NUCmer, a part of the MUMmer package [97], was used to perform pairwise alignment of the  
584 15 genomes. Based on these alignments, PanCake [98] was used with default parameters to  
585 identify specific regions of each genome. Specific regions with a length of 200 bp were  
586 extracted, meeting the following criteria: GC content between 48 and 52%, distance to a border  
587 of a scaffold higher than 300bp, unique in the draft genome. The specificity of each 200bp  
588 region was double-checked with BLAST [27] on the 15-genome database and on the NCBI *nr*  
589 database. The design of primers on the specific regions was performed by Fluidigm. The  
590 primer specificity was checked with BLAST.

591

#### 592 **Animal experiment**

593 All mice were bred according standardized procedures in the gnotobiology unit of BIOASTER  
594 at the ANSES animal facility (Lyon, France), housed in sterilized positive pressure isolators  
595 (Noroit) under a 12h light/dark cycle at 22±2°C and 50±30% of humidity, and fed ad libitum  
596 with irradiated R03-40 diet (3395 kcal/kg, 25.2% kcal proteins, 61.3% kcal carbohydrates,  
597 13.5% kcal lipids; Safe) and autoclaved water. Irradiated corn-cob granules (Safe) were used

598 as bedding. Sterile enrichment was provided in all cages and was constituted by cotton rolls  
599 as nesting material, poplar bricks and a polycarbonate red mouse igloo (Safe). Nesting material  
600 and poplar bricks were renewed every two weeks. All breeders were mated by trio (2 females  
601 and 1 male) between 8 weeks and 6 months of age, and all mice were weaned at 4 weeks  
602 after birth. C57BL/6J GF mice were obtained by aseptic hysterectomy of a C57BL/6J SOPF  
603 female (Charles River Lab.), and neonates were fostered on C3H GF mothers (CDTA). Axenic  
604 status was assessed weekly by gram staining and cultures of fecal suspension on solid and  
605 liquid media. GM15 founders were 8-week-old C57BL/6J GF mice colonized by oral  
606 inoculations of 215  $\mu$ L of the GM15 bacterial community, twice at 48h interval. GM15  
607 microbiota composition was analyzed by qPCR microfluidic assay from feces collected at 6-  
608 week-old. Alternative diet R04-40 (3339 kcal/kg, 19.3% kcal proteins, 72.4% kcal  
609 carbohydrates, 8.4% kcal lipids; Safe) was given at 8-week-old GM15 mice for 4 weeks. FMT  
610 was done by inoculating orally a suspension of fresh fecal pellets to 7-week-old C57BL/6J GF  
611 mice, twice at 48h interval. For undernutrition experiments, GM15 and SOPF mice were bred  
612 and randomly assigned to be given either the above R03-40 diet or a custom-made low-protein  
613 diet (3500 kcal/kg, 4.7% kcal proteins, 90.1% kcal carbohydrates, 5.3% kcal lipids, Envigo) for  
614 5 weeks after weaning. Mice were killed by cervical dislocation and biocollections were  
615 performed aseptically. All animal procedures were approved by ANSES/ENVA/UPEC ethic  
616 committee (APAFIS#4529-2016022616404045v3; APAFIS#785-2015042819315178v2;  
617 APAFIS#18918-2019020118003843v3) and were conducted in accordance with the National  
618 and European legislation on protection of animals used for scientific purposes.

619

#### 620 **gDNA extraction from caecal contents and fecal pellets**

621 Caecal and fecal gDNA were extracted using the DNeasy® PowerLyzer® PowerSoil® Kit  
622 (Qiagen) following the manufacturer's instructions with modifications. Samples (approximately  
623 0.1g) were heat-treated at 65°C for 10 min, and 95°C for 10 min, before a double bead beating  
624 at 30 Hz for 5 min. 50 $\mu$ L of DNA were obtained with two consecutive elutions.

625

626 **Quantitative PCR microfluidic assay**

627 In order to quantify specific and global bacteria load per g of caecal or fecal samples (wet  
628 weight), qPCR microfluidic assay was performed using respectively specific primers for GM15  
629 and “universal” primers amplifying the genes encoding 16S rRNA from most bacteria groups  
630 [99]. Amplicons generated using these primers range between 60 and 99 base pairs. qPCR  
631 microfluidic assays were conducted in 48.48 Dynamic Array™ IFCs for EvaGreen Fast Gene  
632 Expression on a Biomark HD (Fluidigm) according to the manufacturer’s instructions, with  
633 cDNA diluted 100-fold, preamplified with pooled primers, and diluted again 100-fold. Each IFC  
634 included triplicate reactions per DNA sample, standards and negative control. Standards were  
635 generated by serial dilution of a gDNA extract from pure bacterial cultures of known  
636 concentration. The efficiency of each qPCR reaction was calculated based on the slope of  
637 standard curves and within the range of 78-107%. An equivolume mixture of standards was  
638 used to normalize data between runs. Due to the different individual detection limits of the  
639 qPCR assay for each primer, the detection limit for GM15 ranged between  $2.73 \times 10^2$  and  $6.57$   
640  $\times 10^5$  CFU/g (Additional file 2: Table S1).

641

642 **Sample preparation for immunophenotyping**

643 For flow cytometry analyses whole blood was collected on EDTA tube. Spleen, thymus, MLN  
644 and PP were collected in RPMI (Gibco). Single-cell suspensions were achieved using a 100  
645  $\mu$ m cell-stainer (Becton Dickinson) and a 5 mL syringe plunger in RPMI supplemented with 2%  
646 heat-inactivated fetal bovine serum (Sigma) and 100  $\mu$ g/mL DNASE1 (Roche). Cells were then  
647 spun at 400xg for 5 min at room temperature. Medium was discarded and cells were washed  
648 using 5 mL of supplemented medium. For whole blood, spleen and thymus samples, red blood  
649 cells were lysed by resuspension in 1 mL PharmLyse 1X (Becton Dickinson) for 10 min. Cells  
650 were then spun at 400xg for 5 min at room temperature. Lysing solution was discarded and  
651 cells were washed using 2 mL of PBS (Gibco). Cells were pelleted a second time and  
652 resuspended in PBS supplemented with 2% heat-inactivated fetal bovine serum (Sigma).  
653 Numeration and viability were determined using Propidium Iodide marker exclusion and



654 MACSQUANT Flow cytometer (Miltenyi). Cells were then resuspended to a working  
655 concentration of  $10^6$  cells / tube for organs and 100  $\mu$ L / tube for whole blood, and analyzed by  
656 flow cytometry.

657 Whole blood was collected on dry Eppendorf tube for sera analysis. Sera were obtained by  
658 centrifugation 2000xg for 15 min at 4°C and stored at -20°C before Luminex and ELISA  
659 analyses. Feces were collected in Eppendorf low-binding tubes and stored at -80°C before  
660 Luminex analysis. Feces supernatant was obtained by disrupting 100 mg feces in 1mL PBS-  
661 Protease Inhibitor 1X (Sigma) using Lysing Matrix E Tube (MP Biomedicals) and Fast Prep  
662 homogenizer (MP Biomedicals). Samples were spun at 8000xg for 15 min at 4°C and  
663 supernatants were collected for IgA Luminex analysis.

664

#### 665 **Flow Cytometry**

666  $10^6$  cells or totality of cells for some of PP samples were stained for surface markers.  
667 Leukocytes were stained using anti-CD45 Viogreen (Miltenyi, clone30F11) and were checked  
668 for viability using Zombie Green Fixable Viability (Biolegend). T cells were stained using anti-  
669 CD3 BV421 (BD, clone 145-2C11), anti-CD4 PE (Miltenyi, clone REA604) and anti-CD8a PE  
670 Vio615 (Miltenyi, clone REA601). B cells were stained using anti-CD45 RB220 PE Vio770  
671 (Miltenyi, clone RA3-6B2). NK cells were stained using anti-CD335 APC (NKp46) (Miltenyi,  
672 clone 29A1.4.9). Monocytes were stained using anti-CD11b APC Vio770 (Miltenyi, clone  
673 REA592) in spleen, thymus and whole blood samples. Dendritic cells were stained using anti-  
674 CD11c APC Vio770 (Miltenyi, clone REA754) in spleen, PP and MLN samples. Cells were  
675 analyzed using a MACSQuant Ten Flow cytometer (Miltenyi) and raw data were analyzed  
676 using FlowJo software (Tree Star, Becton Dickinson). For CD45+ cell count comparison in  
677 PP, results were normalized to  $10^6$  cells using number of cells stained for each mouse when  
678 less than  $10^6$  viable cells were isolated from PP. Data normalization was not possible for whole  
679 blood sample, thus CD45+ cell count comparison has not been performed for this  
680 compartment. For frequency results, data are represented as a percentage of CD45+ cells for  
681 all organs.

682

### 683 **Metabolic Panel, Ig and Cytokines Luminex**

684 Serum concentrations of Metabolic Panel (Ghrelin, Glucagon, Insulin and Leptin) were  
685 determined using the Mouse Metabolic Magnetic Bead Panel Milliplex MAP kit (Millipore).  
686 Samples were not diluted, and assay was performed according to the manufacturer's  
687 instructions. Serum concentrations of Ig Panel (IgA, IgG1, IgG2a, IgG2b; IgG3, IgM, IgE) and  
688 IgA in feces supernatant were determined using the Mouse Immunoglobulin Isotyping  
689 Magnetic Bead Panel Milliplex MAP kit (Millipore) and Mouse IgE Single Plex Magnetic Bead  
690 Milliplex MAP kit (Millipore). Samples were diluted 1:12500 (IgA, IgG1, IgG2a, IgG2b; IgG3,  
691 IgM), 1:100 (IgE), and 1:100 (IgA in feces supernatant). Assays were performed according to  
692 the manufacturer's instructions. Serum concentrations of Cytokines Panel (IL-1b, IL-10,  
693 IL12p70, IL-17a, IL-17f, IL-22) were determined using the Mouse Th17 Magnetic Bead Panel  
694 Milliplex MAP kit (Millipore). Samples were no diluted and assay was performed according to  
695 the manufacturer' instructions. Samples were assayed in monoplicate.

696

### 697 **Corticosterone and IGF-1 ELISAs**

698 Serum concentrations of Corticosterone were determined using the Corticosterone ELISA kit  
699 (Abnova). Samples were diluted 1:50, and assay was performed according to the  
700 manufacturer' instructions. Serum concentrations of IGF-1 were determined using the  
701 Mouse/Rat IGF-1 Quantikine ELISA kit (R&D Systems). Samples were diluted 1:500, and  
702 assay was performed according to the manufacturer' instructions. Samples were assayed in  
703 monoplicate.

704

### 705 **Sample preparation for metabophenotyping**

706 It is known that the quantification of some plasma metabolites, such as tryptophan and  
707 tyrosine, is biased since they bind to albumin, a highly abundant protein in plasma [100]. In  
708 addition, protein precipitation methods with organic solvents can induce loss of volatile  
709 metabolites and overlay of residual broad resonances of lipids with some polar metabolites

710 [101]. Thus, the polar and non-polar metabolites extraction from the same plasma sample were  
711 prepared with some in-house modifications to previously described sequential approaches  
712 [102, 103]. Briefly, we deproteinized the plasma samples by acidified ultrafiltration in order to  
713 increase desorption yields of aromatic amino acids and then, quantify the polar metabolites.  
714 We also extracted the filter residue of the same sample to analyze the non-polar metabolites.

715

### 716 **Polar metabolites preparation**

717 Frozen mice plasma samples are thawed in thermoshaker Eppendorf (10 min, 10°C and 1000  
718 rpm). The entire amount of plasma about 180 µL is filtered using 0.2 µm centrifugal tube from  
719 VWR (5 min, 10°C, 10000xg). Next, the lipoproteins removal was performed by mixing 150 µL  
720 of filtered plasma with 50 µL milli-Q water and 10 µL deuterated formic acid (2.1% in milli-Q  
721 water) on a clean 10 kDa cut-off ultracentrifugation tube (VWR) using thermoshaker Eppendorf  
722 (10 min, 10°C, 750 rpm) and then centrifuged (30 min, 10°C, 10000xg, soft ramp). Vortexed  
723 10 kDa-filtred plasma samples (135 µL) were transferred in 0.5 mL 96-wellplate Agilent and  
724 mixed with phosphate buffer solution (45 µL, 0.6 M, pH=7.4) containing internal standard DSS-  
725 d4 (1.54 mM), pH-reference standard DFTMP (4 mM) and D<sub>2</sub>O (40%) on thermoshaker  
726 Eppendorf (1.5 min, 10°C, 650 rpm). Finally, the resulting sample solutions (155 µL) were  
727 transferred in 3 mm SampleJet NMR tubes. The DSS-d4 concentration was calibrated by <sup>1</sup>H  
728 NMR using sodium succinate dibasic hexahydrate standard solution. This protocol was  
729 systematically applied to prepare blank and quality control samples. The concentration of the  
730 formic acid was optimized to allow desorption of the metabolites like tryptophan from plasma  
731 albumin. Deuterated formic acid instead of protonated form was used to decrease the  
732 exogenous NMR signal and allow the quantification of the endogenous formiate. All  
733 ultracentrifugation filters are previously recovered from tubes and washed separately from  
734 residual glycerol in a 250 mL Duran bottle, plunged in milli-Q water and then sonicated in a  
735 bath for 10 min. This washing procedure is repeated five times. After the last step of the  
736 washing the ultracentrifugation filters could be stored in water for at least 3 months. Just before  
737 use traces of milli-Q water from ultracentrifugation filters are dispersed outside with nitrogen

738 stream. We observed that this procedure of washing removes better the residual glycerol than  
739 supplier's protocol and gives higher yields of ultrafiltered plasma.

740

#### 741 **Non-polar metabolites extraction after ultrafiltration**

742 The lipoproteins on the 10 kDa filters was further diluted with 150  $\mu$ L phosphate buffer solution  
743 (1 M, pH=7.4) and mixed on thermoshaker Eppendorf (10 min, 10°C, 750 rpm). The  
744 lipoproteins samples were then transferred in clean Eppendorf tubes and extracted with 400  
745  $\mu$ L methanol-dichlormethan (1:2 v/v). Samples were centrifuged (5 min, 10°C, 10000xg) for  
746 better phase separation. The dichlormethan layer was transferred in clean Eppendorf tube and  
747 the aqueous phase was extracted again with dichlormethan. The pulled organic phase was  
748 evaporated under nitrogen stream. The dry lipidic residue was dissolved with 200  $\mu$ L  
749 deuterated chloroform containing 0.03% TMS internal standard and 155  $\mu$ L of resulting solution  
750 was transferred in 3 mm SampleJet NMR tube. The TMS concentration was calibrated by NMR  
751 using 1,3,5-tritertbutylbenzen standard solution and it was found to be 0.435 mM.

752

#### 753 **Metabolites analysis and quantification**

754 The 1D  $^1$ H NMR spectra were acquired at 298 K with 600 MHz Ascend (Avance III HD)  
755 spectrometer from Bruker equipped with a 5 mm QCI cryoprobe. All samples were stored at  
756 6°C in the SampleJet autosampler. Polar metabolites were analyzed using *noesygppr1d* pulse  
757 sequence. For each spectrum, 128 scans were collected into 32k data points within 14 ppm  
758 spectroscopic width and a recycling delay of 4 s. The mixing time was calibrated to 50 ms and  
759 the acquisition time was 3.9 s. The non-polar metabolites NMR spectra were acquired using  
760 *zg30* pulse sequence. The spectra were recording using 256 scans, into 32k data point and a  
761 spectroscopic width of 20 ppm. The relaxation delay was 4 s. The FIDs were zero-filled to 64k  
762 points and Fourier transformed using 0.3 Hz exponential line-broadening function. All spectra  
763 were aligned to DSS-d4 and TMS respectively internal standard. The concentrations of the  
764 polar and non-polar metabolites were quantified using Chenomx NMR suite 8.1. The Chenomx  
765 software was applied also for spectra binning of 10<sup>-3</sup> ppm width for each bin. The triacyl glycerol

766 (TAG), phosphatidylcholine (PC), lysophosphatidylcholine (LysoPC), sphingomyelin (SM), free  
767 cholesterol (FC) and cholesterol ester (EC) quantification an in-house lipid database within  
768 Chenomx was built with authentic lipid standards. The lipids database spectra were recorded  
769 using the same parameters as described above for non-polar metabolites.

770

### 771 **Metabolomics data analysis**

772 Discriminant analyses were performed using the partial least square (PLS-DA) algorithm to  
773 extract metabolomics signatures [104, 105]. A variable selection algorithm based on Elastic-  
774 Net was used to improve model performance by selecting most significant metabolic  
775 signatures that explain the groups (GF, GM15, SOPF). The statistical performances of the  
776 regression models were assessed using the balanced error rate with and without cross-  
777 validation (E2 and CV-E2) and permutation tests. Permutation tests consisted in building the  
778 null distribution of the balanced error rate E2 by randomly permuting observations. Regression  
779 models were thus challenged by testing if the cross-validation error rate CV-E2 is significantly  
780 different from the null distribution with a p-value < 0.05. Metabolites involved in the cross-  
781 validated signatures were ranked by order of importance in the PLS-DA model using their VIP  
782 (variable importance in projection) scores. The biplot allows projecting onto the two first  
783 components, the samples and the metabolites that significantly discriminate each sample  
784 groups. Metabolites that are positively correlated (or positively contribute) to a sample group  
785 will point to the direction of this group. They will point to the reverse direction for a negative  
786 correlation.

787

### 788 **Statistics**

789 Reproductive performance and body growth were analyzed respectively by 1-way and 2-way  
790 ANOVA. Phenotyping data impacted by age, filial generation or sex, were analyzed by the F-  
791 test for multiple linear regressions (R v3.4.2), otherwise by 1-way ANOVA and Tukey's multiple  
792 comparison parametric test or Kruskal-Wallis and Dunn's multiple comparison non-parametric  
793 test after D'Agostino et Pearson test for data set normality assessment (GraphPad Prism v7

794 and v8). PCA for phenotyping analysis was performed using R v3.4.2 and the ade4 package  
795 [106].

796

## 797 **Additional files**

798 **Additional file 1: Figure S1.** Morphological features of the GM15 strains. (TIFF 2312 kb)

799 **Additional file 2: Table S1.** GM15 strains-specific primers. (XLSX 11 kb)

800 **Additional file 3: Table S2.** KEGG clusters. (XLSX 142 kb)

801 **Additional file 4: Figure S2.** *In vivo* experimental design. (TIFF 591 kb)

802 **Additional file 5: Figure S3.** Assessment of gut microbiota stability of GM15 founders, and of  
803 reproducibility between fecal and caecal samples of individual mice. (TIFF 799 kb)

804 **Additional file 6: Figure S4.** Immune cell populations profiling. (TIFF 471 kb)

805 **Additional file 7: Table S3.** Polar metabolites. (XLSX 18 kb)

806 **Additional file 8: Table S4.** Non-polar metabolites. (XLSX 16 kb)

807 **Additional file 9: Figure S5.** PCA based on binned NMR spectra. (TIFF 1374 kb)

808 **Additional file 10: Figure S6.** Measurements of several organs after nutritional challenge.  
809 (TIFF 1011 kb)

810

## 811 **Abbreviations**

812 ASF: Altered Schaedler flora; BD: Breeding diet; bp: Base pair; CFU: colony forming units;

813 CNA: Colistin and naladixic acid; DD: Depleted diet; FMT: Fecal microbiota transplantation;

814 GAM: Gifu anaerobic medium; gDNA: Genomic deoxyribonucleic acid; GF: Germ-free; IFC:

815 Integrated fluidic circuit; KO: KEGG orthology; MLN: mesenteric lymph nodes; MRS: Man

816 Rogosa Sharpe medium; OTU: Operational taxonomic unit; PCA: Principal coordinate

817 analysis; PP: Peyer's patches; NMR: Nuclear magnetic resonance; qPCR: Quantitative

818 polymerase chain reaction; SEM: Standard error of the mean; SOPF: Specific opportunistic

819 pathogen-free; WGS: Whole genome sequencing

820

821 **Acknowledgments**

822 We thank Julie Henry, Leanne Goncalves, Christelle Boisse, Gustavo Stadthagen Gomez,  
823 Vincent Thomas and Gianfranco Grompone for help with bacterial cultures and gram staining,  
824 and discussions.

825

826 **Funding**

827 This work was supported by the French Government (PIA). Research in F.L lab is supported  
828 by ENS de Lyon, CNRS, the FINOVI foundation and the “Fondation pour la Recherche  
829 Médicale” (« Equipe FRM DEQ20180339196).

830

831 **Availability of data and materials**

832 The 15 assembled genomes and the corresponding sequencing reads have been deposited  
833 in the DDBJ/ENA/GenBank data banks and the Sequence Read Archive respectively, under  
834 the BioProject number PRJNA551571 (GenBank accession no.: VIRE00000000,  
835 VIRD00000000, VIRC00000000, VIRB00000000, VIRA00000000, VIQZ00000000,  
836 VIQY00000000, VIQX00000000, VIQW00000000, VIQV00000000, VIQU00000000,  
837 VIQT00000000, VIQS00000000, VIQR00000000, VIQQ00000000 ; SRA accession no.:  
838 SRR9696643 to SRR9696657).

839

840 **Author's contributions**

841 MD, FL and AT conceived the project, analyzed, interpreted and integrated all the data. MD  
842 and FL wrote the manuscript. MD prepared figures. LB and JY achieved *in silico* design. MD  
843 performed bacteria isolation and identification, gDNA extraction, developed the qPCR  
844 microfluidic assay and analyzed macroscopic phenotyping data. AS carried out WGS, CE  
845 identified specific regions for primers design, and AM performed taxonomic annotation and  
846 functional bioinformatic analyses. PB, HD and MD performed animal experiments. CC, AD, JC  
847 and SP performed the immunophenotyping, analyzed and interpreted data. AB and DAO  
848 performed the metabophenotyping, analyzed and interpreted data. MS helped design the diet

849 induced stunting protocol. FDV performed, analyzed and contributed to the text and figures  
850 related to the stunting model experiments. ALB provided technical support during the stunting  
851 model experiments. All authors read and approved the final manuscript.

852

### 853 **Ethics approval**

854 Mouse experiments were performed as approved under the MESR and ANSES/ENVA/UPEC  
855 Ethical Committee, protocols 2015042819315178 and 2016022616404045.

856

### 857 **Consent for publication**

858 Not applicable.

859

### 860 **Competing interests**

861 The authors declare that they have no competing interests.

862

### 863 **References**

- 864 1. Lynch SV, Pedersen O. The Human Intestinal Microbiome in Health and Disease. *NEJM*.  
865 2016;375:2369-79.
- 866 2. Knight R, Callewaert C, Marotz C, Hyde ER, Debelius JW, McDonald D, Sogin ML. The  
867 Microbiome and Human Biology. *Annu Rev Genomics Hum Genet*. 2017;18:65-86.
- 868 3. Bik EM. The Hoops, Hopes, and Hypes of Human Microbiome Research. *Yale J Biol Med*.  
869 2016;89:363-73.
- 870 4. Leulier F, MacNeil LT, Lee WJ, Rawls JF, Cani PD, Schwarzer M, Zhao L, Simpson SJ.  
871 Integrative Physiology: At the Crossroads of Nutrition, Microbiota, Animal Physiology, and  
872 Human Health. *Cell metab*. 2017;25:522-34.
- 873 5. Nguyen TLA, Vieira-Silva S, Liston A, Raes J. How informative is the mouse for human gut  
874 microbiota research? *Dis Model Mech*. 2015;8:1-16.
- 875 6. Mähler Convenor M, Berard M, Feinstein R, Gallagher A, Illgen-Wilcke B, Pritchett-Corning  
876 K, Raspa M. FELASA recommendations for the health monitoring of mouse, rat, hamster,



- 877 guinea pig and rabbit colonies in breeding and experimental units. *Lab Anim.* 2014;48:178-  
878 92.
- 879 7. Mamantopoulos M, Ronchi F, Van Hauwermeiren F, Vieira-Silva S, Yilmaz B, Martens L,  
880 Saeys Y, Drexler SK, Yazdi AS, Raes J, Lamkanfi M, McCoy KD, Wullaert A. Nlrp6- and  
881 ASC-Dependent Inflammasomes Do Not Shape the Commensal Gut Microbiota  
882 Composition. *Immunity.* 2017;47:339-48.
- 883 8. Ussar S, Griffin NW, Bezy O, Fujisaka S, Vienberg S, Softic S, Deng L, Bry L, Gordon JI,  
884 Kahn CR. Interactions between Gut Microbiota, Host Genetics and Diet Modulate the  
885 Predisposition to Obesity and Metabolic Syndrome. *Cell Metab.* 2015;22:516-30.
- 886 9. Mooser C, Gomez de Agüero M, Ganai-Vonarburg SC. Standardization in host-microbiota  
887 interaction studies: challenges, gnotobiology as a tool, and perspective. *Curr Opin*  
888 *Microbiol.* 2018;44:50-60.
- 889 10. Laukens D, Brinkman BM, Raes J, De Vos M, Vandenabeele P. Heterogeneity of the  
890 gut microbiome in mice: guidelines for optimizing experimental design. *FEMS Microbiol*  
891 *Rev.* 2016;40:117-32.
- 892 11. Stappenbeck TS, Virgin HW. Accounting for reciprocal host-microbiome interactions in  
893 experimental science. *Nature.* 2016;534:191-9.
- 894 12. Clavel T, Lagkouvardos I, Blaut M, Stecher B. The mouse gut microbiome revisited:  
895 From complex diversity to model ecosystems. *Int J Med Microbiol.* 2016;306:316-327.
- 896 13. McCoy KD, Geuking MB, Ronchi F. Gut Microbiome Standardization in Control and  
897 Experimental Mice. *Curr Protoc Immunol.* 2017;117:1-13.
- 898 14. Ley RE, Bäckhed F, Turnbaugh P, Lozupone CA, Knight RD, Gordon JI. Obesity alters  
899 gut microbial ecology. *Proc Natl Acad Sci U S A.* 2005;102:11070-5.
- 900 15. Xiao L, Feng Q, Liang S, Sonne SB, Xia Z, Qiu X, Li X, Long H, Zhang J, Zhang D, Liu  
901 C, Fang Z, Chou J, Glanville J, Hao Q, Kotowska D, Colding C, Licht TR, Wu D, Yu J, Sung  
902 JJ, Liang Q, Li J, Jia H, Lan Z, Tremaroli V, Dworzynski P, Nielsen HB, Bäckhed F, Doré J,  
903 Le Chatelier E, Ehrlich SD, Lin JC, Arumugam M, Wang J, Madsen L, Kristiansen K. A  
904 catalog of the mouse gut metagenome. *Nat Biotechnol.* 2015;33:1103-8.

- 905 16. Macpherson AJ, McCoy KD. Standardised animal models of host microbial mutualism.  
906 *Mucosal Immunol.* 2015;8:476-86.
- 907 17. Lagkouvardos I, Pukall R, Abt B, Foesel BU, Meier-Kolthoff JP, Kumar N, Bresciani A,  
908 Martínez I, Just S, Ziegler C, Brugiroux S, Garzetti D, Wenning M, Bui TP, Wang J,  
909 Hugenholtz F, Plugge CM, Peterson DA, Hornef MW, Baines JF, Smidt H, Walter J,  
910 Kristiansen K, Nielsen HB, Haller D, Overmann J, Stecher B, Clavel T. The Mouse Intestinal  
911 Bacterial Collection (miBC) provides host-specific insight into cultured diversity and  
912 functional potential of the gut microbiota. *Nat Microbiol.* 2016;1:16131.
- 913 18. Clavel T, Gomes-Neto JC, Lagkouvardos I, Ramer-Tait AE. Deciphering interactions  
914 between the gut microbiota and the immune system via microbial cultivation and minimal  
915 microbiomes. *Immunol Rev.* 2017;279:8-22.
- 916 19. Wymore Brand M, Wannemuehler MJ, Phillips GJ, Proctor A, Overstreet AM, Jergens  
917 AE, Orcutt RP, Fox JG. The Altered Schaedler Flora: Continued Applications of a Defined  
918 Murine Microbial Community. *ILAR Journal.* 2015;56:169-78.
- 919 20. Brugiroux S, Beutler M, Pfann C, Garzetti D, Ruscheweyh HJ, Ring D, Diehl M, Herp  
920 S, Lötscher Y, Hussain S, Bunk B, Pukall R, Huson DH, Münch PC, McHardy AC, McCoy  
921 KD, Macpherson AJ, Loy A, Clavel T, Berry D, Stecher B. Genome-guided design of a  
922 defined mouse microbiota that confers colonization resistance against *Salmonella enterica*  
923 serovar Typhimurium. *Nature Microbiology.* 2016;2:16215.
- 924 21. Schaedler RW, Dubos R, Costello R. *J Exp Med.* 1965;122:77-83.
- 925 22. Norin E, Midtvedt T. Intestinal microflora functions in laboratory mice claimed to harbor  
926 a "normal" intestinal microflora. Is the SPF concept running out of date? *Anaerobe.*  
927 2010;16:311-3.
- 928 23. Uchimura Y, Wyss M, Brugiroux S, Limenitakis JP, Stecher B, McCoy KD, Macpherson  
929 AJ. Complete Genome Sequences of 12 Species of Stable Defined Moderately Diverse  
930 Mouse Microbiota 2. *Genome Announc.* 2016;4.

- 931 24. Garzetti D, Brugiroux S, Bunk B, Pukall R, McCoy KD, Macpherson AJ, Stecher B.  
932 High-Quality Whole-Genome Sequences of the Oligo-Mouse-Microbiota Bacterial  
933 Community. *Genome Announc.* 2017;5.
- 934 25. Kim D, Song L, Breitwieser FP, Salzberg SL. Centrifuge: rapid and sensitive  
935 classification of metagenomic sequences. *Genome Res.* 2016;26:1721-9.
- 936 26. O'Leary NA, Wright MW, Brister JR, Ciufo S, Haddad D, McVeigh R, Rajput B,  
937 Robbertse B, Smith-White B, Ako-Adjei D, Astashyn A, Badretdin A, Bao Y, Blinkova O,  
938 Brover V, Chetvernin V, Choi J, Cox E, Ermolaeva O, Farrell CM, Goldfarb T, Gupta T, Haft  
939 D, Hatcher E, Hlavina W, Joardar VS, Kodali VK, Li W, Maglott D, Masterson P, McGarvey  
940 KM, Murphy MR, O'Neill K, Pujar S, Rangwala SH, Rausch D, Riddick LD, Schoch C,  
941 Shkeda A, Storz SS, Sun H, Thibaud-Nissen F, Tolstoy I, Tully RE, Vatsan AR, Wallin C,  
942 Webb D, Wu W, Landrum MJ, Kimchi A, Tatusova T, DiCuccio M, Kitts P, Murphy TD, Pruitt  
943 KD. Reference sequence (RefSeq) database at NCBI: current status, taxonomic expansion,  
944 and functional annotation. *Nucleic Acids Res.* 2016;44:D733-45.
- 945 27. Altschul SF, Gish W, Miller W, Myers EW, Lipman DJ. Basic local alignment search  
946 tool. *J Mol Biol.* 1990;215:403-10.
- 947 28. Plaza-Diaz J, Ruiz-Ojeda FJ, Gil-Campos M, Gil A. Mechanisms of action of probiotics.  
948 *Adv Nutr.* 2019;10:S49-66.
- 949 29. Feldman-Salit A, Hering S, Messiha HL, Veith N, Cojocar V, Sieg A, Westerhoff HV,  
950 Kreikemeyer B, Wade RC, Fiedler T. Regulation of the activity of lactate dehydrogenases  
951 from four lactic acid bacteria. *J Biol Chem.* 2013;288:21295-306.
- 952 30. Galperin MY. Genome diversity of spore-forming Firmicutes. *Microbiol Spectr.* 2013;1.
- 953 31. Browne HP, Forster SC, Anonye BO, Kumar N, Neville BA, Stares MD, Goulding D,  
954 Lawley TD. Culturing of 'unculturable' human microbiota reveals novel taxa and extensive  
955 sporulation. *Nature.* 2016;533:543-46.
- 956 32. Mukhopadhyaya I, Moraïs S, Laverde-Gomez J, Sheridan PO, Walker AW, Kelly W,  
957 Klieve AV, Ouwerkerk D, Duncan SH, Louis P, Koropatkin N, Cockburn D, Kibler R, Cooper  
958 PJ, Sandoval C, Crost E, Juge N, Bayer EA, Flint HJ. Sporulation capability and amylosome

- 959 conservation among diverse human colonic and rumen isolates of the keystone starch-  
960 degrader *Ruminococcus bromii*. *Environ Microbiol.* 2018;20:324-36.
- 961 33. Pearson JP, Brownlee IA. The interaction of large bowel microflora with the colonic  
962 mucus barrier. *Int J Inflam.* 2010;2010:321426.
- 963 34. Macy JM, Ljungdahl LG, Gottschalk G. Pathway of succinate and propionate formation  
964 in *Bacteroides fragilis*. *J Bacteriol.* 1978;134:84-91.
- 965 35. Johnson JL, Moore WEC, Moore LVH. *Bacteroides Cacca* sp.nov., *Bacteroides*  
966 *merdae* sp.nov., and *Bacteroides stercoris* sp.nov. isolated from human feces. *Int J Sys*  
967 *Bacteriol.* 1986;36:499-501.
- 968 36. Wannemuehler MJ, Overstreet AM, Ward DV, Phillips GJ. Draft genome sequences of  
969 the altered schaedler flora, a defined bacterial community from gnotobiotic mice. *Genome*  
970 *Announc.* 2014;2.
- 971 37. Thompson GR, Trexler PC. Gastrointestinal structure and function in germ-free or  
972 gnotobiotic animals. *Gut.* 1971; 12:230-235.
- 973 38. Schwarzer M, Makki K, Storelli G, Machuca-Gayet I, Srutkova D, Hermanova P, Martino  
974 ME, Balmand S, Hudcovic T, Heddi A, Rieusset J, Kozakova H, Vidal H, Leulier F.  
975 *Lactobacillus plantarum* strain maintains growth of infant mice during chronic undernutrition.  
976 *Science.* 2016;351:854-7.
- 977 39. Yan J, Herzog JW, Tsang K, Brennan CA, Bower MA, Garrett WS, Sartor BR, Aliprantis  
978 AO, Charles JF. Gut microbiota induce IGF-1 and promote bone formation and growth. *Proc*  
979 *Natl Acad Sci U S A.* 2016;113:E7554-63.
- 980 40. Chung H, Pamp SJ, Hill JA, Surana NK, Edelman SM, Troy EB, Reading NC,  
981 Villablanca EJ, Wang S, Mora JR, Umesaki Y, Mathis D, Benoist C, Relman DA, Kasper  
982 DL. Gut immune maturation depends on colonization with a host-specific microbiota. *Cell.*  
983 2012;149:1578-93.
- 984 41. Sjögren YM, Tomicic S, Lundberg A, Böttcher MF, Björkstén B, Sverremark-Ekström  
985 E, Jenmalm MC. Influence of early gut microbiota on the maturation of childhood mucosal  
986 and systemic immune responses. *Clin Exp Allergy.* 2009;39:1842-51.

- 987 42. Cahenzli J, Köller Y, Wyss M, Geuking MB, McCoy KD. Intestinal microbial diversity  
988 during early-life colonization shapes long-term IgE levels. *Cell Host Microbe*. 2013;14:559-  
989 70.
- 990 43. Koch MA, Reiner GL, Lugo KA, Kreuk LSM, Stanbery AG, Ansaldo E, Seher TD,  
991 Ludington WB, Barton GM. Maternal IgG and IgA antibodies dampen mucosal T helper cell  
992 responses in early life. *Cell*. 2016;165:827-41.
- 993 44. Tanaka M, Nakayama J. Development of the gut microbiota in infancy and its impact  
994 on health in later life. *Allergol Int*. 2017;66:515-22.
- 995 45. Hong SW, O E, Lee JY, Lee M, Han D, Ko HJ, Sprent J, Surh CD, Kim KS. Food  
996 antigens drive spontaneous IgE elevation in the absence of commensal microbiota. *Sci Adv*.  
997 2019;5:eaaw1507.
- 998 46. Atarashi K, Tanoue T, Shima T, Imaoka A, Kuwahara T, Momose Y, Cheng G,  
999 Yamasaki S, Saito T, Ohba Y, Taniguchi T, Takeda K, Hori S, Ivanov II, Umesaki Y, Itoh K,  
1000 Honda K. Induction of colonic regulatory T cells by indigenous *Clostridium* species. *Science*.  
1001 2011;331:337-41.
- 1002 47. Nishimori JH, Newman TN, Oppong GO, Rapsinski GJ, Yen JH, Biesecker SG, Wilson  
1003 RP, Butler BP, Winter MG, Tsolis RM, Ganea D, Tükel Ç. Microbial amyloids induce  
1004 interleukin 17A (IL-17A) and IL-22 responses via Toll-like receptor 2 activation in the  
1005 intestinal mucosa. *Infect Immun*. 2012;80:4398-408.
- 1006 48. McAleer JP, Kolls JK. Mechanisms controlling Th17 cytokine expression and host  
1007 defense. *J Leukoc Biol*. 2011;90:263-70.
- 1008 49. Hegazy AN, West NR, Stubbington MJT, Wendt E, Suijker KIM, Datsi A, This S, Danne  
1009 C, Campion S, Duncan SH, Owens BMJ, Uhlig HH, McMichael A; Oxford IBD Cohort  
1010 Investigators, Bergthaler A, Teichmann SA, Keshav S, Powrie F. Circulating and Tissue-  
1011 Resident CD4+ T Cells With Reactivity to Intestinal Microbiota Are Abundant in Healthy  
1012 Individuals and Function Is Altered During Inflammation. *Gastroenterology*. 2017;153:1320-  
1013 37.

- 1014 50. Dixon BR, Radin JN, Piazuolo MB, Contreras DC, Algood HM. IL-17a and IL-22 Induce  
1015 Expression of Antimicrobials in Gastrointestinal Epithelial Cells and May Contribute to  
1016 Epithelial Cell Defense against *Helicobacter pylori*. *PLoS One*. 2016;11:e0148514.
- 1017 51. Douzandeh-Mobarrez B, Kariminik A. Gut Microbiota and IL-17A: Physiological and  
1018 Pathological Responses. *Probiotics Antimicrob Proteins*. 2019;11:1-10.
- 1019 52. Alex P, Zachos NC, Nguyen T, Gonzales L, Chen TE, Conklin LS, Centola M, Li X.  
1020 Distinct Cytokine Patterns Identified from Multiplex Profiles of Murine DSS and TNBS-  
1021 Induced Colitis. *Inflamm Bowel Dis*. 2009;15:341-52.
- 1022 53. Durand A, Audemard-Verger A, Guichard V, Mattiuz R, Delpoux A, Hamon P, Bonilla  
1023 N, Rivière M, Delon J, Martin B, Auffray C, Boissonnas A, Lucas B. Profiling the lymphoid-  
1024 resident T cell pool reveals modulation by age and microbiota. *Nat Commun*. 2018;9:68.
- 1025 54. Kennedy EA, King KY, Baldrige MT. Mouse Microbiota Models: Comparing Germ-  
1026 Free Mice and Antibiotics Treatment as Tools for Modifying Gut Bacteria. *Front Physiol*.  
1027 2018;9:1534.
- 1028 55. Milovanovic M, Drozdenko G, Weise C, Babina M, Worm M. Interleukin-17A promotes  
1029 IgE production in human B cells. *J Invest Dermatol*. 2010;130:2621-8.
- 1030 56. Nakae S, Komiyama Y, Nambu A, Sudo K, Iwase M, Homma I, Sekikawa K, Asano M,  
1031 Iwakura Y. Antigen-specific T cell sensitization is impaired in IL-17-deficient mice, causing  
1032 suppression of allergic cellular and humoral responses. *Immunity*. 2002;17:375-87.
- 1033 57. Ma CS, Chew GY, Simpson N, Priyadarshi A, Wong M, Grimbacher B, Fulcher DA,  
1034 Tangye SG, Cook MC. Deficiency of Th17 cells in hyper IgE syndrome due to mutations in  
1035 STAT3. *J Exp Med*. 2008;205:1551-7.
- 1036 58. Eberl G. Immunity by equilibrium. *Nat Rev Immunol*. 2016;16:524-32.
- 1037 59. Shida K, Makino K, Morishita A, Takamizawa K, Hachimura S, Ametani A, Sato T,  
1038 Kumagai Y, Habu S, Kaminogawa S. *Lactobacillus casei* inhibits antigen-induced IgE  
1039 secretion through regulation of cytokine production in murine splenocyte cultures. *Int Arch*  
1040 *Allergy Immunol*. 1998;1154:278-87.

- 1041 60. Ekmekci I, von Klitzing E, Neumann C, Bacher P, Scheffold A, Bereswill S, Heimesaat  
1042 MM. Fecal Microbiota Transplantation, Commensal *Escherichia coli* and *Lactobacillus*  
1043 *johnsonii* Strains Differentially Restore Intestinal and Systemic Adaptive Immune Cell  
1044 Populations Following Broad-spectrum Antibiotic Treatment. *Front Microbiol.* 2017;8:2430.
- 1045 61. Szkaradkiewicz AK, Stopa J, Karpinski TM. Effect of oral administration involving a  
1046 probiotic strain of *Lactobacillus reuteri* on pro-inflammatory cytokine response in patients  
1047 with chronic periodontitis. *Arch Immunol Ther Exp (Warsz).* 2014;62:495-500.
- 1048 62. Haileselassie Y, Johansson MA, Zimmer CL, Bjorkander S, Petursdottir DH, Dicksved  
1049 J, Petersson M, Persson JO, Fernandez C, Roos S, Holmlund U, Sverremark-Ekström E.  
1050 *Lactobacilli* regulate *Staphylococcus aureus* 161:2-induced pro-inflammatory T-cell  
1051 responses in vitro. *PLoS One.* 2013;8:e77893.
- 1052 63. Ishioka M, Miura K, Minami S, Shimura Y, Ohnishi H. Altered Gut Microbiota  
1053 Composition and Immune Response in Experimental Steatohepatitis Mouse Models. *Dig*  
1054 *Dis Sci.* 2017;62:396-406.
- 1055 64. Sepp E, Julge K, Mikelsaar M, Bjorksten B. Intestinal microbiota and immunoglobulin  
1056 E responses in 5-year-old Estonian children. *Clin Exp Allergy.* 2005;35:1141-6.
- 1057 65. Prince BT, Mandel MJ, Nadeau K, Singh AM. Gut Microbiome and the Development of  
1058 Food Allergy and Allergic Disease. *Pediatr Clin North Am.* 2015;62:1479-92.
- 1059 66. Marrs T, Sim K. Demystifying dysbiosis: Can the gut microbiome promote oral tolerance  
1060 over IgE-mediated food allergy? *Curr Pediatr Rev.* 2018;14:156-63.
- 1061 67. Tanoue T, Morita S, Plichta DR, Skelly AN, Suda W, Sugiura Y, et al. A defined  
1062 commensal consortium elicits CD8 T cells and anti-cancer immunity. *Nature.* 2019;565:600-  
1063 5.
- 1064 68. Nicholson JK, Holmes E, Kinross J, Burcelin R, Gibson G, Jia W, Pettersson S. Host-  
1065 gut microbiota metabolic interactions. *Science.* 2012;336:1262-7.
- 1066 69. Cani PD, Knauf C. How gut microbes talk to organs: The role of endocrine and nervous  
1067 routes. *Mol Metab.* 2016;5:743-52.

- 1068 70. Mestdagh R, Dumas ME, Rezzi S, Kochhar S, Holmes E, Claus SP, Nicholson JK. Gut  
1069 microbiota modulate the metabolism of brown adipose tissue in mice. *J Proteome Res.*  
1070 2012;11:620-30.
- 1071 71. Claus SP, Tsang TM, Wang Y, Cloarec O, Skordi E, Martin FP, Rezzi S, Ross A,  
1072 Kochhar S, Holmes E, Nicholson JK. Systemic multicompartmental effects of the gut  
1073 microbiome on mouse metabolic phenotypes. *Mol Syst Biol.* 2008;4:219.
- 1074 72. Org E, Blum Y, Kasela S, Mehrabian M, Kuusisto J, Kangas AJ, Soininen P, Wang Z,  
1075 Ala-Korpela M, Hazen SL, Laakso M, Lusa AJ. Relationships between gut microbiota,  
1076 plasma metabolites, and metabolic syndrome traits in the METSIM cohort. *Genome Biol.*  
1077 2017;18:70.
- 1078 73. Mardinoglu A, Shoaie S, Bergentall M, Ghaffari P, Zhang C, Larsson E, Bäckhed F,  
1079 Nielsen J. The gut microbiota modulates host amino acid and glutathione metabolism in  
1080 mice. *Mol Syst Biol.* 2015;11:834.
- 1081 74. Trent CM, Blaser MJ. Microbially Produced Acetate: A "Missing Link" in Understanding  
1082 Obesity? *Cell Metab.* 2016;24:9-10.
- 1083 75. He X, Slupsky CM. Metabolic fingerprint of dimethyl sulfone (DMSO<sub>2</sub>) in microbial-  
1084 mammalian co-metabolism. *J Proteome Res.* 2014;13:5281-92.
- 1085 76. Dorokhov YL, Shindyapina AV, Sheshukova EV, Komarova TV. Metabolic methanol:  
1086 molecular pathways and physiological roles. *Physiol Rev.* 2015;95:603-44.
- 1087 77. Max B, Salgado JM, Rodríguez N, Cortés S, Converti A, Domínguez JM.  
1088 Biotechnological production of citric acid. *Braz J Microbiol.* 2010;41:862-75.
- 1089 78. Elshagabee FM, Bockelmann W, Meske D, de Vrese M, Walte HG, Schrezenmeir J,  
1090 Heller KJ. Ethanol Production by Selected Intestinal Microorganisms and Lactic Acid  
1091 Bacteria Growing under Different Nutritional Conditions. *Front Microbiol.* 2016;7:47.
- 1092 79. Santos GA, Moura RF, Vitorino DC, Roman EA, Torsoni AS, Velloso LA, Torsoni MA.  
1093 Hypothalamic AMPK activation blocks lipopolysaccharide inhibition of glucose production  
1094 in mice liver. *Mol Cell Endocrinol.* 2013;381:88-96.



- 1095 80. Molinaro A, Caesar R, Holm LM, Tremaroli V, Cani PD, Bäckhed F. Host-microbiota  
1096 interaction induces bi-phasic inflammation and glucose intolerance in mice. *Mol Metab.*  
1097 2017;6:1371-80.
- 1098 81. Lee YH, Hsu HC, Kao PC, Shiao YJ, Yeh SH, Shie FS, Hsu SM, Yeh CW, Liu HK, Yang  
1099 SB, Tsay HJ. Augmented Insulin and Leptin Resistance of High Fat Diet-Fed  
1100 APPswe/PS1dE9 Transgenic Mice Exacerbate Obesity and Glycemic Dysregulation. *Int J*  
1101 *Mol Sci.* 2018;19.
- 1102 82. Kaplan SA, Cohen P. The somatomedin hypothesis 2007: 50 years later. *J Clin*  
1103 *Endocrinol Metab.* 2007;92:4529-35.
- 1104 83. Klover P, Hennighausen L. Postnatal body growth is dependent on the transcription  
1105 factors signal transducers and activators of transcription 5a/b in muscle: a role for  
1106 autocrine/paracrine insulin-like growth factor I. *Endocrinology.* 2007;148:1489-97.
- 1107 84. Luczynski P, McVey Neufeld KA, Oriach CS, Clarke G, Dinan TG, Cryan JF. Growing  
1108 up in a Bubble: Using Germ-Free Animals to Assess the Influence of the Gut Microbiota on  
1109 Brain and Behavior. *Int J Neuropsychopharmacol.* 2016;19.
- 1110 85. Blanton LV, Barratt MJ, Charbonneau MR, Ahmed T, Gordon JI. Childhood  
1111 undernutrition, the gut microbiota, and microbiota-directed therapeutics. *Science.*  
1112 2016;352:1533.
- 1113 86. Gehrig JL, Venkatesh S, Chang HW, Hibberd MC, Kung VL, Cheng J, Chen RY,  
1114 Subramanian S, et al. Effects of microbiota-directed foods in gnotobiotic animals and  
1115 undernourished children. *Science.* 2019;365.
- 1116 87. Edgar RC. 2018. Updating the 97% identity threshold for 16S ribosomal RNA OTUs.  
1117 *Bioinformatics.* 2018;34:2371-5.
- 1118 88. Wang Q, Garrity GM, Tiedje JM, Cole JR. Naive Bayesian classifier for rapid  
1119 assignment of rRNA sequences into the new bacterial taxonomy. *Appl Environ Microbiol.*  
1120 2007;73:5261-7.

- 1121 89. Kim OS, Cho YJ, Lee K, Yoon SH, Kim M, Na H, Park SC, Jeon YS, Lee JH, Yi H, Won  
1122 S, Chun J. Introducing EzTaxon-e: a prokaryotic 16S rRNA gene sequence database with  
1123 phylotypes that represent uncultured species. *Int J Syst Evol Microbiol.* 2012;62:716-21.
- 1124 90. Andrews S. FastQC: a quality control tool for high throughput sequence data. 2010.  
1125 Available online at: <http://www.bioinformatics.babraham.ac.uk/projects/fastqc>
- 1126 91. Coil D, Jospin G, Darling AE. A5-miseq: an updated pipeline to assemble microbial  
1127 genomes from Illumina MiSeq data. *Bioinformatics.* 2015;31:587-9.
- 1128 92. Darling AE, Tritt A, Eisen JA, Facciotti MT. Mauve Assembly Metrics. *Bioinformatics.*  
1129 2011;27:2756-7.
- 1130 93. Chen S, Huang T, Zhou Y, Han Y, Xu M, Gu J. AfterQC: automatic filtering, trimming,  
1131 error removing and quality control for fastq data. *BMC Bioinformatics.* 2017;18:80.
- 1132 94. Hyatt D, Chen GL, Locascio PF, Land ML, Larimer FW, Hauser LJ. Prodigal:  
1133 prokaryotic gene recognition and translation initiation site identification. *BMC*  
1134 *Bioinformatics.* 2010;11:119.
- 1135 95. Finn RD, Clements J, Arndt W, Miller BL, Wheeler TJ, Schreiber F, Bateman A, Eddy  
1136 SR. HMMER web server: 2015 update. *Nucleic Acids Res.* 2015;43:W30-8.
- 1137 96. Kanehisa M, Sato Y, Kawashima M, Furumichi M, Tanabe M. KEGG as a reference  
1138 resource for gene and protein annotation. *Nucleic Acids Res.* 2016;44:D457-62.
- 1139 97. Delcher AL, Salzberg SL, Phillippy AM. Using MUMmer to identify similar regions in  
1140 large sequence sets. *Curr Protoc Bioinformatics.* 2003;Chapter 10:Unit 10.3.
- 1141 98. Ernst C, Rahmann S. PanCake: a data structure for pangenomes. German conference  
1142 on bioinformatics 2013. 2013:35-45.
- 1143 99. Packey CD, Shanahan MT, Manick S, Bower MA, Ellermann M, Tonkonogy SL, Carroll  
1144 IM, Sartor RB. Molecular detection of bacterial contamination in gnotobiotic rodent units.  
1145 *Gut Microbes.* 2013;4:361-70.
- 1146 100. Spector AA. Fatty acid binding to plasma albumin. *J Lipid Res.* 1975;16:165-79.
- 1147 101. Nagana Gowda GA, Raftery D. Quantitating metabolites in protein precipitated serum  
1148 using NMR spectroscopy. *Anal Chem.* 2014;86:5433-40.

- 1149 102. Tiziani S, Emwas AH, Lodi A, Ludwig C, Bunce CM, Viant MR, Günther UL. Optimized  
1150 metabolite extraction from blood serum for <sup>1</sup>H nuclear magnetic resonance spectroscopy.  
1151 Anal Biochem. 2008;377:16-23.
- 1152 103. Tynkkynen T. <sup>1</sup>H NMR analysis of serum lipids. Publications of the University of Eastern  
1153 Finland. Dissertations in Forestry and Natural Sciences, no 76. 2012. URN:ISBN:978-952-  
1154 61-0839-1
- 1155 104. Wold S, Sjöström M, Eriksson L. PLS-regression: a basic tool of chemometrics.  
1156 Chemometr Intel Lab. 2001;58:109-30.
- 1157 105. Barker M, Rayens W. Partial least squares for discrimination. J Chemometr.  
1158 2003;17:166-73.
- 1159 106. Dray S, Dufour AB. The ade4 Package: Implementing the Duality Diagram for  
1160 Ecologists. J Stat Soft. 2007;22:1-20.
- 1161 107. Yutin N, Galperin MY. A genomic update on clostridial phylogeny: Gram-negative spore  
1162 formers and other misplaced clostridia. Environ Microbiol. 2013;15:2631-41.

1163

1164

## 1165 Legends

1166 **Fig. 1. Selection, isolation and functional analysis of GM15 strains.** **a** Composition of  
1167 representative and prevalent bacterial families identified from fecal samples of 4 C57BL/6J  
1168 mice of our colony. **b** 11 bacterial strains were isolated from fecal or caecal samples of either  
1169 C57BL/6J or ASF mice using various culture methods. 4 additional strains were obtained from  
1170 the DSMZ collection. **c** Unique KO (KEGG Orthology) groups are those present in only one  
1171 GM15 member. The unique contribution of each GM15 member is relatively evenly distributed  
1172 (<2%), except *E. coli* whose unique functions contribute for 33%, although non-unique KO  
1173 groups are primarily responsible for the GM15's metagenomic profile with 59% of contribution.  
1174 **d** Heat map of hierarchical clustering of enzymatic activities in the gut for the 15 strains of the  
1175 GM15 model. In quorum sensing (QS) function, only effector proteins were screened (because  
1176 receptors suffer of similarities with nonspecific QS receptors). **e** Heat map of hierarchical

1177 clustering of KEGG modules distribution in the metagenomes of GM15, SOPF, ASF and Oligo-  
1178 MM<sub>12</sub> models. Clusters of KEGG modules are highlighted with their respective size (number of  
1179 KEGG modules). The list of KEGG modules and clusters is shown in Additional file 3: Table  
1180 S2.

1181

1182 **Fig. 2. Stability assessments of the GM15 mice gut microbiota over filial generations, in**  
1183 **aging, under diet change and through FMT.** SOPF groups show the distribution of each  
1184 GM15 strains in the complex gut microbiota of 8-week-old SOPF mice. The absolute  
1185 quantification of each strain was determined by specific qPCR microfluidic assay. To gain  
1186 clarity, each GM15 strain is associated to a number between 1 and 15. \* Strains 4, 6, 7 and 14  
1187 were at the detection limit of the qPCR microfluidic assay, and thus were not detected in all  
1188 samples. \*\* Strains 8, 9 and 10 were below detection limit of the qPCR microfluidic assay.  
1189 Strain 5, obtained from the DSMZ collection, was not detected in our SOPF colony. **a** Radar  
1190 plot showing the GM15 strains distribution in feces of GF C57Bl/6J mice colonized with the  
1191 GM15 community (F0, n=10) and bred for consecutive generations (F1 to F4, n=19 to 8). **b**  
1192 Radar plot showing the overall stability of the GM15 community composition in feces collected  
1193 from 9 mice between 2 and 12 months of age (2 mice died at 12-month-old). **c** Radar plot  
1194 showing that an alternative diet, such as a maintenance diet, can be used for 4 weeks, and  
1195 then reversed to the breeding diet for 4 more weeks, without modifying the composition of the  
1196 gut microbiota of GM15 mice (n=18) compared to mice fed all along with the breeding diet  
1197 (n=9). **d** Radar plot showing the feasibility of GM15 fecal microbiota transplantation to GF mice  
1198 (n=9). **e** Box plots showing the low variability of the GM15 strains concentrations considering  
1199 all fecal samples of mice from generation F1 to F4 (n=47), from generation F1 at 12-month-old  
1200 (n=7), from generation F1 under diet change (n=18), and fecal samples collected 3 weeks post  
1201 fecal microbiota transplantation in GF mice. Whiskers represent min and max data.

1202

1203 **Fig. 3. Macroscopic phenotyping on mice from two consecutive filial generations (F1-**  
1204 **F2).** **a-c** 1-way ANOVA analyses of the reproductive performance, where dots, lines and error

1205 bars represent respectively individual litters (34 GF, 31 GM15 and 19 SOPF), means and SEM.  
1206 **a** GM15, like SOPF, delivered pups around 24 days after mating, against 33 days for GF mice.  
1207 **b** GM15 mean litter of 5 pups was in between GF (4 pups) and SOPF (6 pups). **c** Perinatal  
1208 mortality was similar for GM15 and SOPF (12 and 11%), and much lower than for GF mice  
1209 (45%). **d** Box plots showing no difference between GF, GM15 and SOPF mice in terms of feed  
1210 intake, although much variability was observed with GF mice. Whiskers represent min and max  
1211 data. **e-f** 2-way ANOVA analyses of body growth of mice bred with their mothers until week 4,  
1212 where lines and error bars represent respectively means and SEM. Body weight and size  
1213 curves of GM15 mice (9 females (F), 12 males (M)) were similar or equivalent to those of SOPF  
1214 mice (10 F, 10 M), whereas GF mice showed a significant delayed growth (7 F, 10 M). **g-h**  
1215 Organs weight or size impacted by age, filial generation or sex, were analyzed by the F-test  
1216 for multiple linear regressions, otherwise by 1-way ANOVA. Each animal is represented by a  
1217 dot at the age of the sacrifice. **g** The characteristic caecum enlargement of GF mice was  
1218 partially, but significantly, reduced in GM15 mice. The weights of the brain, liver and spleen  
1219 were equivalent in GM15 and SOPF mice, and significantly bigger than those of GF mice. **h**  
1220 Femur and tibia lengths were also equivalent in GM15 and SOPF mice, and significantly bigger  
1221 than those of GF mice. \*P<0.05, \*\*P<0.01, \*\*\*P<0.001, \*\*\*\*P<0.0001.

1222

1223 **Fig. 4. Immune phenotyping through serum and fecal immunoglobulin subtyping,**  
1224 **circulating cytokines analysis and immune cell populations analysis in different organs**

1225 **a-c** Dot plots where dots, lines and error bars represent respectively individual mice (15-17  
1226 GF, 20-21 GM15 and 20 SOPF), means and SEM. **a** Fecal IgA, serum IgA, IgG2b, IgG3, IgM  
1227 and IgE Luminex analysis. F-test for multiple linear regression analyses (fecal IgA) and Dunn's  
1228 multiple comparison showing restoration of fecal IgA, serum IgA and serum IgG2b levels in  
1229 GM15-colonized mice at the same level than SOPF, slightly increased IgM levels in GM15  
1230 mice compared to SOPF mice and elevated levels of IgG3 and IgE levels in GM15 mice  
1231 compared to SOPF and GF mice. **b** Circulating IL-17a and IL-22 levels Luminex analysis.  
1232 Dunn's multiple comparison showing elevated IL-17a levels in GM15 mice compared to SOPF

1233 and GF mice and restoration of IL-22 levels in GM15 mice at the same level than SOPF. **c**  
1234 CD45+ count comparison in spleen, thymus, MLN and PP by flow cytometry. Dunn's multiple  
1235 comparison showing increased CD45+ cell count in spleen, thymus, and PP of SOPF mice  
1236 compared to GF mice, levels of GM15 mice are in between, and no difference between groups  
1237 for MLN. Tukey's multiple comparison showing increased PP in SOPF mice, then in GM15  
1238 mice, compared to GF mice. \*P<0.05, \*\*P<0.01, \*\*\*P<0.001, \*\*\*\*P<0.0001.

1239

1240 **Fig. 5. Metabolic phenotyping of GM15 animals.** **a** PCA score plot representing the  
1241 distribution of the sample in the two first principal components. **b** Biplot representing the  
1242 projection the samples in the PLS-DA score plot given by the two first components and the  
1243 projection of the contribution of significant metabolites. **c** F-test for multiple linear regressions  
1244 showing equivalent decreased levels of Free Cholesterol and Phosphatidylcholine in GM15  
1245 and SOPF mice compared to GF mice. **d-e** Circulating hormones Luminex analysis. Dot plots  
1246 where dots, lines and error bars represent respectively individual mice (16 GF, 21 GM15 and  
1247 19-20 SOPF), means and SEM. **d** Dunn's multiple comparison showing restoration of serum  
1248 IGF-1 titers in GM15-colonized mice at the same level than SOPF. **e** F-test for multiple linear  
1249 regressions showing equivalent and reduced serum corticosterone concentrations in GM15  
1250 and SOPF mice, compared to GF mice.

1251

1252 **Fig. 6. GM15 mice and SOPF respond differently under post-weaning chronic**  
1253 **undernutrition.** Body weight (**a**) and body size (**b**) were measured every week from weaning  
1254 to post-natal day 56. **c.** Representative picture of caecum, subcutaneous fat and right femur  
1255 of mice at day 56. Tibia length (**d**), liver (**e**) and epididymal white adipose tissue (**f**) weight were  
1256 measured. **g.** PCA of tissue weight and size showed clustering of GM15 and SOPF under  
1257 control conditions but a distinct pattern under nutritional stress. Percentages on each axis  
1258 indicate the variance associated to each coordinate. **h.** Serum IGF1 at day 56. BD: breeding  
1259 diet; DD: depleted diet. P-values after two-way ANOVA were adjusted for Sidak's post-hoc test  
1260 for multiple comparisons. \*P<0.05, \*\*P<0.01, \*\*\*P<0.001.

1261

1262 **Additional file 1: Figure S1. Morphological features of the GM15 strains.** Each bacterial  
1263 strain was grown individually from a single colony isolated on agar medium and amplified in  
1264 liquid culture to exponential growth phase. Bacteria were Gram-stained and imaged by light  
1265 microscopy (80-fold magnification, NanoZoomer S60, Hamamatsu). Members of  
1266 Bacteroidaceae, Tannerellaceae and Enterobacteriaceae stained Gram-negative, while  
1267 Lactobacillaceae, Erysipelotrichaceae and Ruminococcaceae stained Gram-positive.  
1268 Lachnospiraceae stained Gram-positive, except *Lachnospiraceae* sp. MD329 and  
1269 *Lachnospiraceae* bacterium COE1, which stained Gram-negative likely due to their cell wall  
1270 structure as already reported for other Clostridiales [107].

1271

1272 **Additional file 2: Table S1. GM15 strains-specific primers.** Sequences of primers designed  
1273 in this study and detection limits by qPCR microfluidic assay.

1274

1275 **Additional file 3: Table S2. KEGG clusters.**

1276

1277 **Additional file 4: Figure S2. *In vivo* experimental design.** First, 5 couples of 8 week-old  
1278 C57BL/6J GF mice were colonized by oral inoculations of the GM15 bacterial community, twice  
1279 at 48h interval (F0). GM15 microbiota stability was assessed by qPCR microfluidic assay from  
1280 feces collected after 1, 2 and 3 weeks. Then, in order to evaluate the reproducible transfer of  
1281 the GM15 microbiota by fecal microbiota transplantation, 7 week-old C57BL/6J GF mice were  
1282 colonized by oral inoculations of a suspension of fresh fecal pellets from GM15 mice (F0),  
1283 twice at 48h interval. Again, qPCR microfluidic assay from feces collected after 1, 2 and 3  
1284 weeks was carried out. Next, the GM15 mouse line was amplified to monitor the GM15  
1285 microbiota through four filial generations at 6 weeks of age (F1-F4), and allow the phenotyping  
1286 study from two consecutive generations (F1.2 and F2.1). Reproduction performance and  
1287 perinatal mortality were recorded, 4 week-old mice were randomly selected at weaning,  
1288 monitored weekly for body weight and size, and feed intake, until sacrifice at 8-9 weeks of age.

1289 GF and SOPF mice were also studied as control groups. Besides, a comparative analysis was  
1290 done on the fecal microbiota of 8 week-old GM15 mice (F1.1) either fed with the breeding diet  
1291 or an alternative isocaloric diet given for 4 weeks. Finally, the fecal microbiota of 6 month-old  
1292 and 12 month-old control GM15 mice fed with the breeding diet was analyzed.

1293

1294 **Additional file 5: Figure S3. Assessment of gut microbiota stability in GM15 founders**  
1295 **(F0, n=10), and of reproducibility between fecal and caecal samples of individual GM15**  
1296 **mice (F2, n=11).** SOPF group shows the distribution of each GM15 strains in the complex gut  
1297 microbiota of 8-week-old SOPF mice. The absolute quantification of each strain was  
1298 determined by specific qPCR microfluidic assay. To gain clarity, each GM15 strain is  
1299 associated to a number between 1 and 15. \* Strains 4, 6, 7 and 14 were at the detection limit  
1300 of the qPCR microfluidic assay, and thus were not detected in all samples. \*\* Strains 8, 9 and  
1301 10 were below detection limit of the qPCR microfluidic assay. Strain 5, obtained from the DSMZ  
1302 collection, was not detected in our SOPF colony. **a** Radar plot showing the GM15 strains  
1303 distribution in feces of GF C57Bl/6J mice before and 1, 2 and 3 weeks after the oral colonization  
1304 with the GM15 community. **b** Radar plot showing the reproducible detection of the GM15  
1305 strains in feces and caecum collected from the same GM15 mice.

1306

1307 **Additional file 6: Figure S4. Immune markers. Immune cell populations profiling analysis**  
1308 **by flow cytometry in different organs a-e** Dot plots where dots, lines and error bars  
1309 represent respectively individual mice (13-17 GF, 21 GM15 and 19-20 SOPF), means and  
1310 SEM. **a** Tukey's multiple comparison showing restoration of whole blood monocytes levels in  
1311 GM15 mice at the same levels than in SOPF mice and difference of B cells levels between the  
1312 3 groups. **b** Tukey's multiple comparison showing splenic dendritic levels slightly decreased  
1313 in GM15 mice compared to SOPF, and Dunn's multiple comparison showing restoration of NK  
1314 cells levels in GM15 mice at the same levels than in SOPF mice. **c** Tukey's multiple comparison  
1315 showing restoration of MLN CD8+ T cells and B cells levels in GM15 mice at the same levels  
1316 than in SOPF mice. **d** Tukey's multiple comparison thymic CD4+ T cells levels restored in



1317 GM15 mice at the same levels than in SOPF. **e** Tukey's multiple comparison showing slightly  
1318 decreased PP CD4+ T cells in GM15 mice compared to SOPF and Dunn's multiple comparison  
1319 showing increased PP dendritic cells levels in GF mice compared to SOPF mice and increased  
1320 NK cells levels in GF and GM15 mice compared to SOPF.

1321

1322 **Additional file 7: Table S3. Polar metabolites concentration in plasma samples of GF,**  
1323 **GM15 and SOPF mice.** The metabolites quantification was performed with the help of  
1324 Chenomx NMR suite 8.3. The concentrations are reported as mean and standard deviation.

1325

1326 **Additional file 8: Table S4. Non-polar metabolites concentration in plasma samples of**  
1327 **GF, GM15 and SOPF mice.** The metabolites quantification was performed with the help of  
1328 Chenomx NMR suite 8.3. The non-polar database profiles were created with the help of  
1329 Compound builder module using  $^1\text{H}$  NMR spectra of authentic lipid standards. The  
1330 concentrations are reported as mean and standard deviation.

1331

1332 **Additional file 9: Figure S5. PCA screen plot based on  $^1\text{H}$  NMR plasma fingerprints.**  
1333 Processed  $^1\text{H}$  NMR plasma spectra of polar metabolites were binned with AMIX v3.9.14  
1334 software from Bruker Biospin, using 0.04ppm width from 0.5 to 10ppm spectral window. The  
1335 residual water region from 4.68 to 4.88pp was excluded from analysis. All spectra were  
1336 normalized to the total spectral area and the data table was exported into SIMCA v13.0.3  
1337 software for statistical analysis. The PCA analysis was performed using UV-scaling of data  
1338 and the model was autofit using cross validation rules to determine the number of significant  
1339 components. The clouds of sample points GF, GM15 and SOPF are distributed according to  
1340 microbiota complexity from left to right on PC1 (18%) and top to down on PC2 (12%).

1341

1342 **Additional file 10: Figure S6. Measurements of several organs after nutritional**  
1343 **challenge.** Measurements at day 56 of weights of caecum (**a**), visceral (**b**) and subcutaneous  
1344 (**c**) white adipose tissue, brown adipose tissue (**d**), kidneys (**e**) and soleus muscle (**f**) and length

1345 of right femur (**g**). P-values after two-way ANOVA were adjusted for Sidak's post-hoc test for  
1346 multiple comparisons. **h**. Correlation matrix showing Pearson r values of all the measured  
1347 parameters. For PCA, brown adipose tissue was excluded, given its lack of correlation with  
1348 other parameters.

**a**

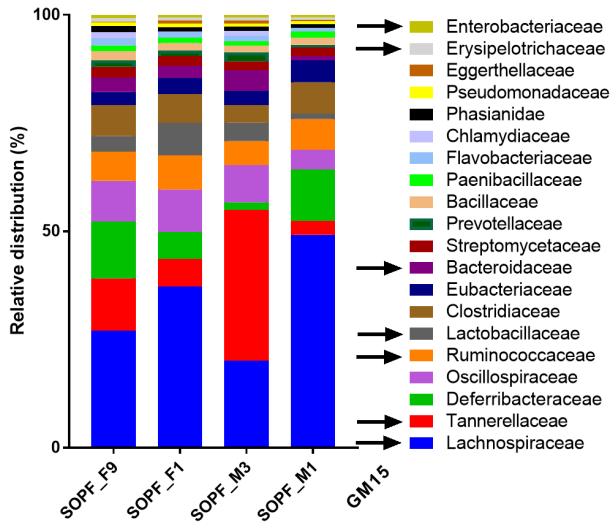

**b**

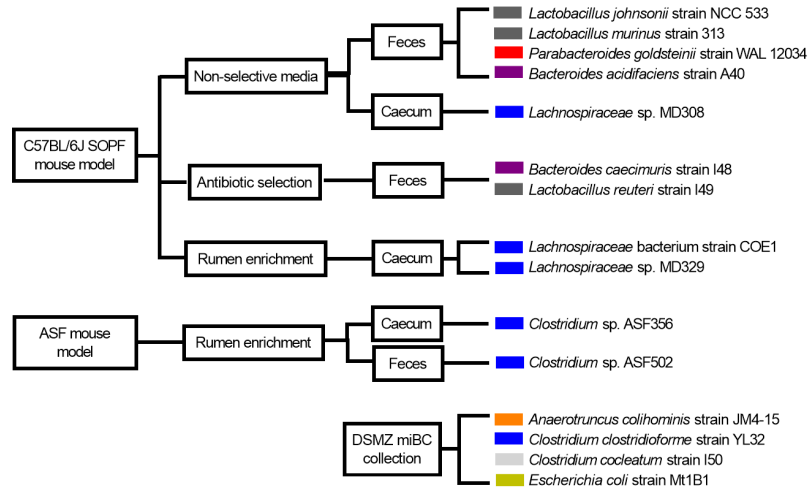

**c**

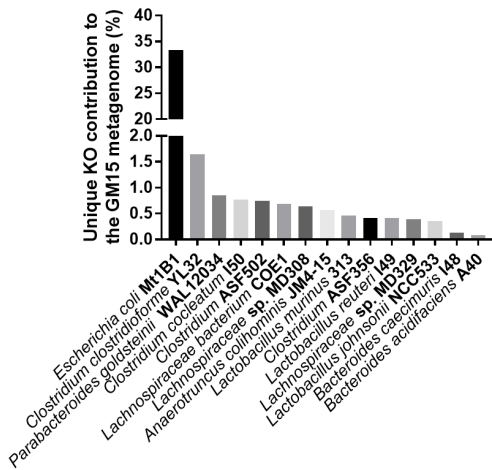

**d**

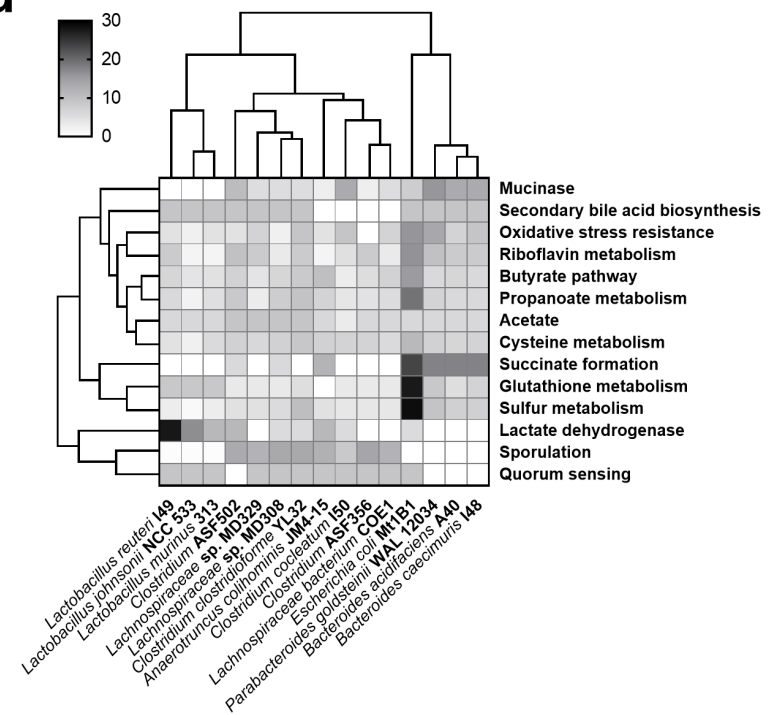

**e**

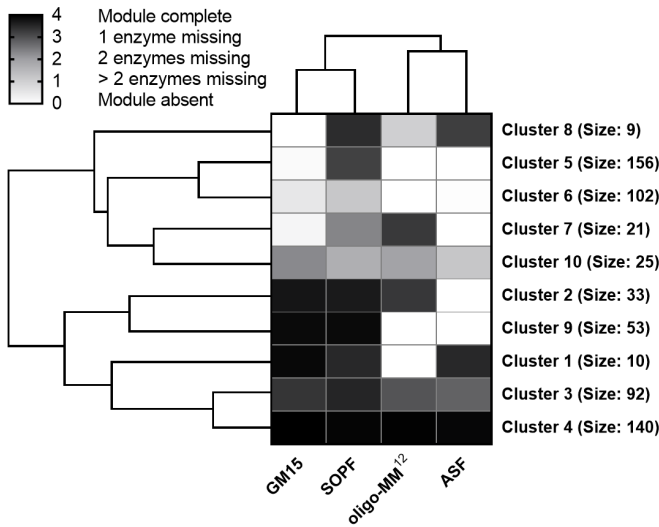

**a**

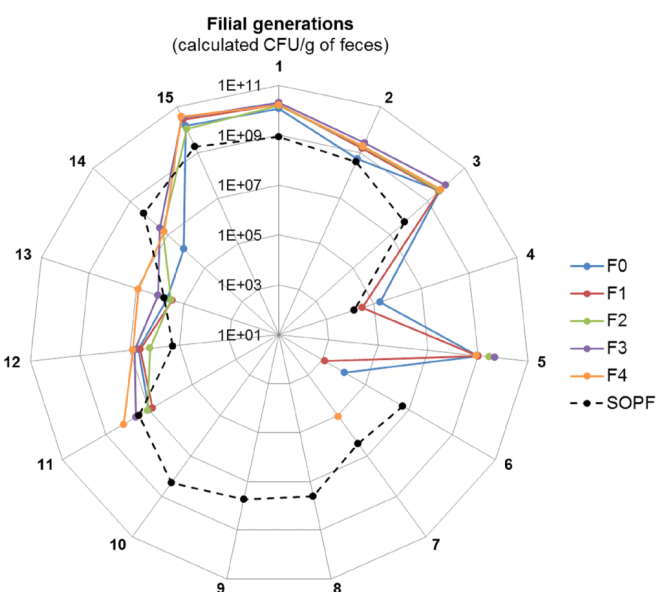

**b**

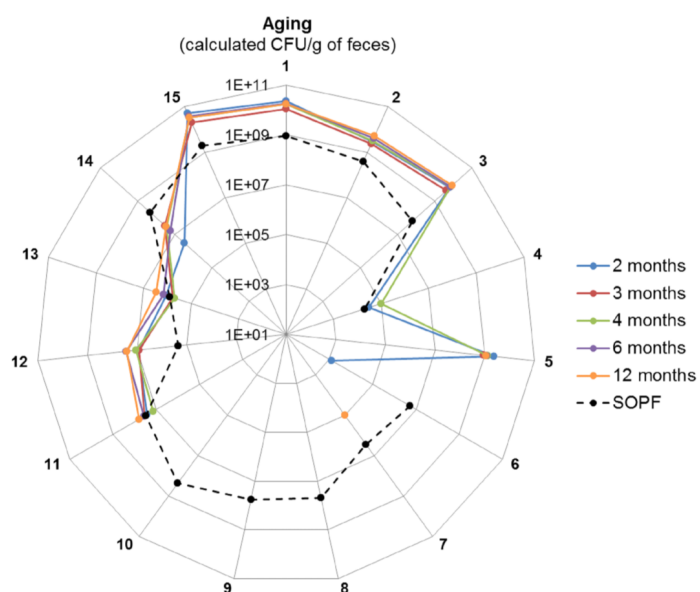

**c**

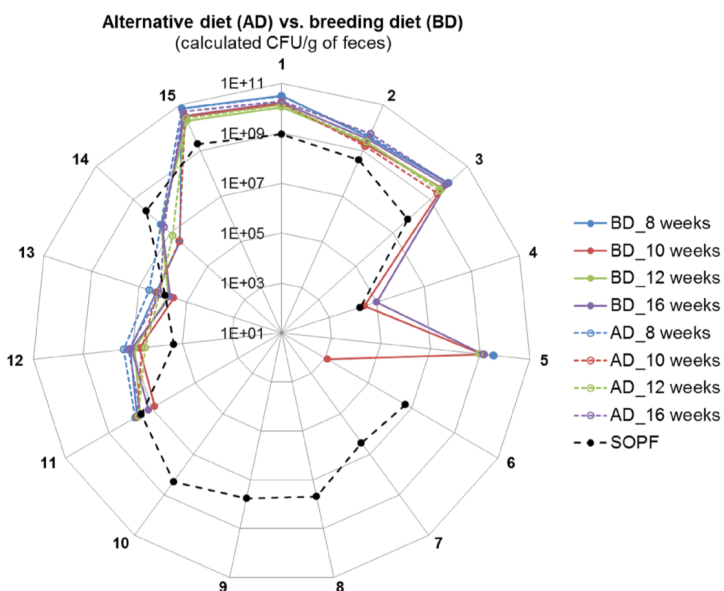

**d**

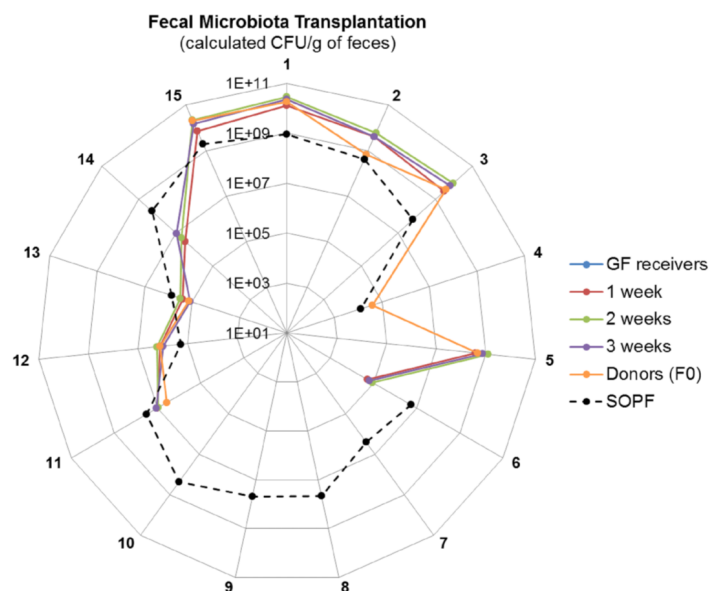

**e**

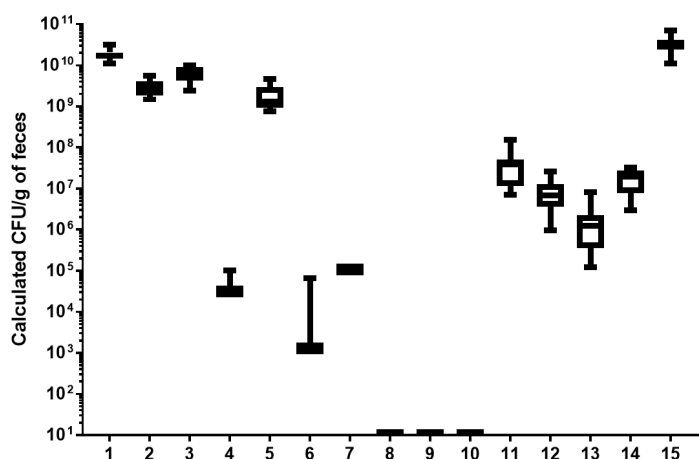

1. *Bacteroides acidifaciens* A40
2. *Bacteroides caecimuris* I48
3. *Parabacteroides goldsteinii* WAL 12034
4. *Clostridium cocleatum* I50 \*
5. *Clostridium clostridioforme* YL32
6. *Clostridium* ASF356 \*
7. *Clostridium* ASF502 \*
8. *Lachnospiraceae* bacterium COE1 \*\*
9. *Lachnospiraceae* sp. MD329 \*\*
10. *Lachnospiraceae* sp. MD308 \*\*
11. *Lactobacillus johnsonii* NCC 533
12. *Lactobacillus murinus* 313
13. *Lactobacillus reuteri* I49
14. *Anaerotruncus colihominis* JM4-15 \*
15. *Escherichia coli* Mt1B1

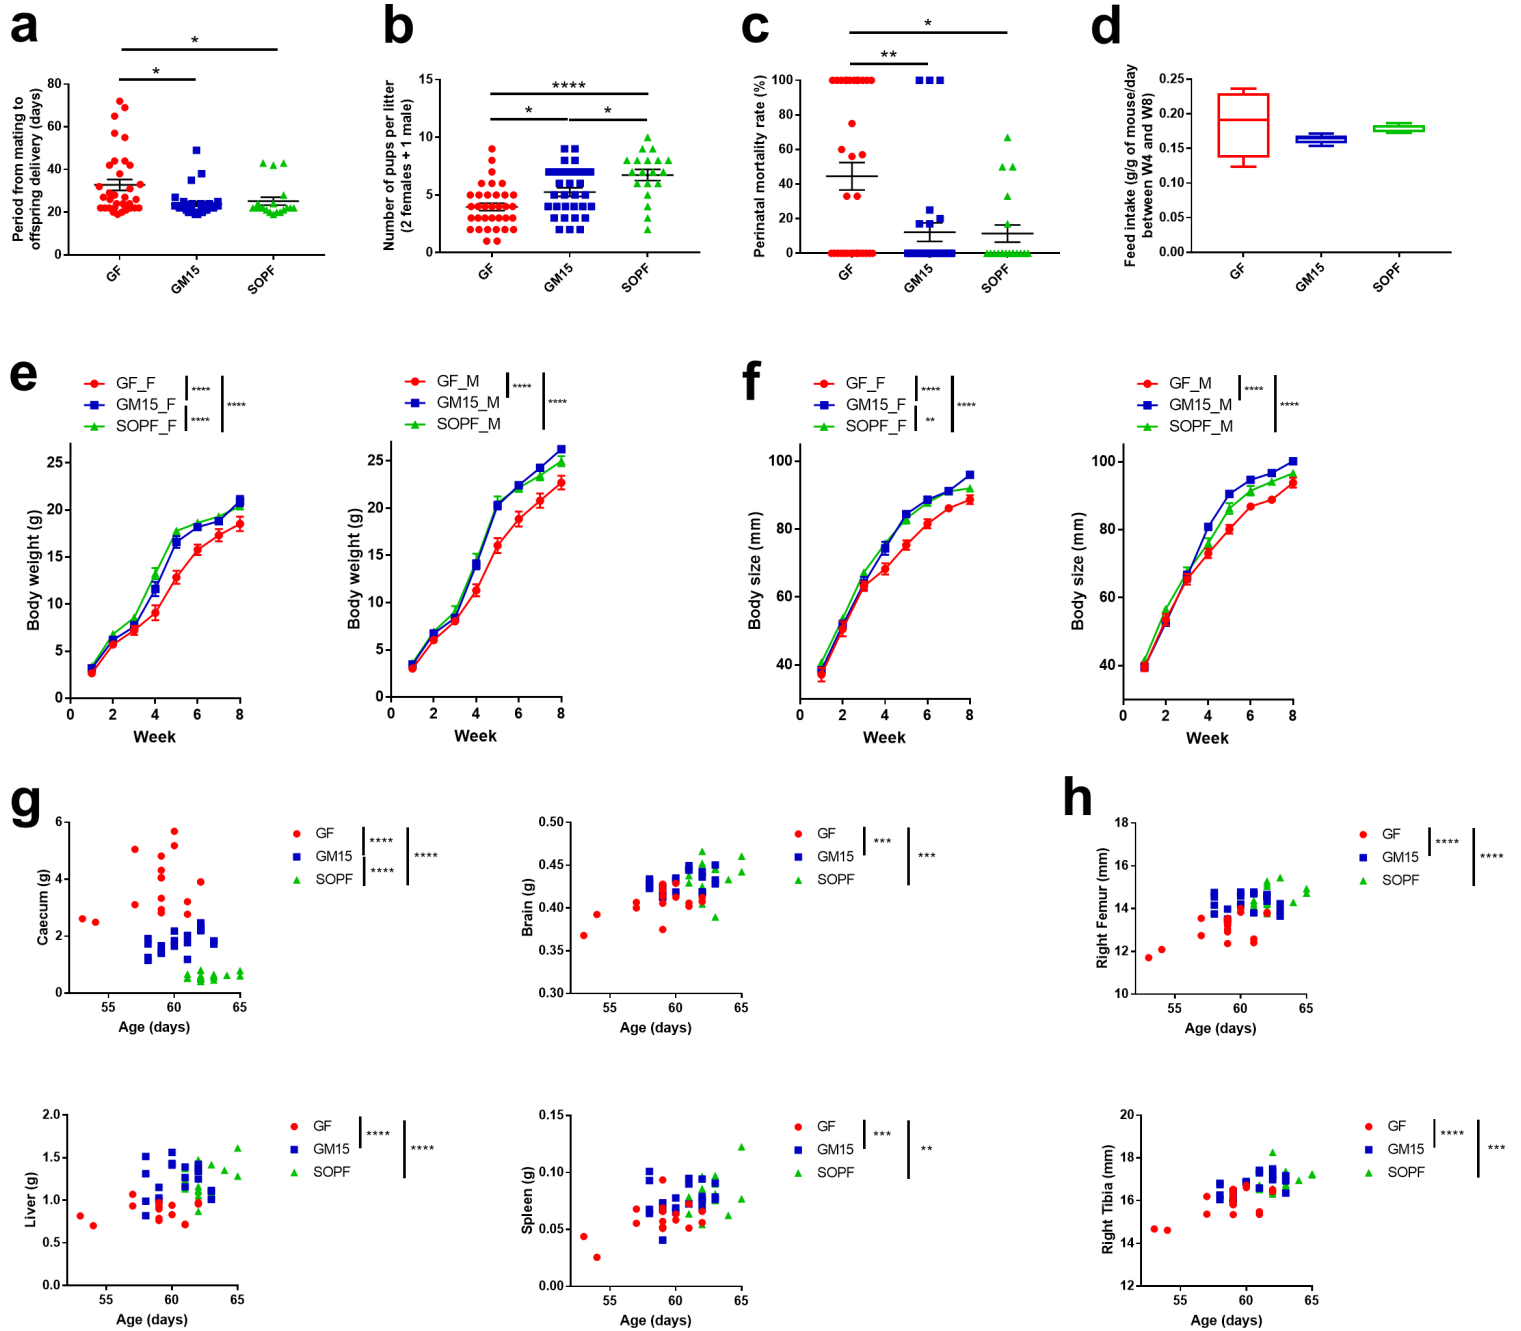

**a**

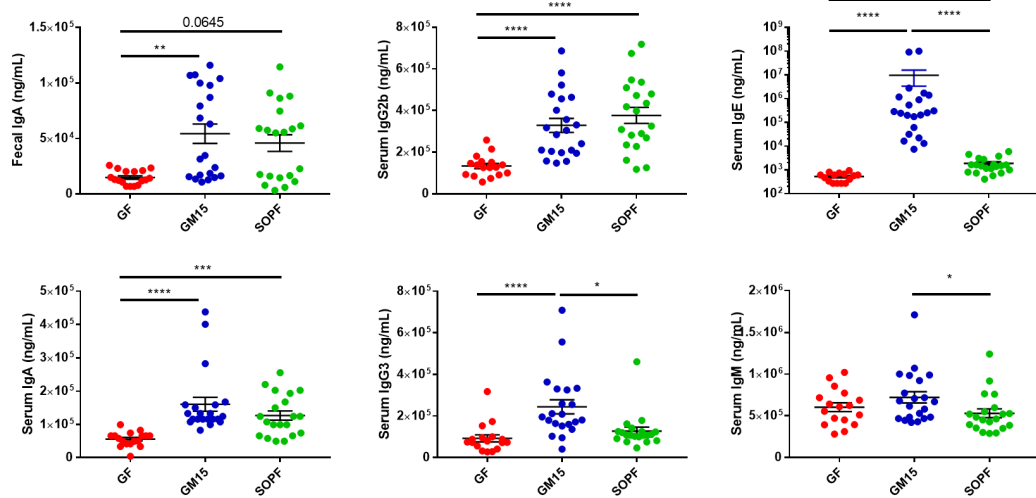

**b**

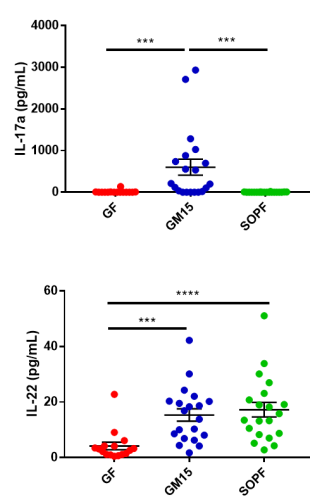

**c**

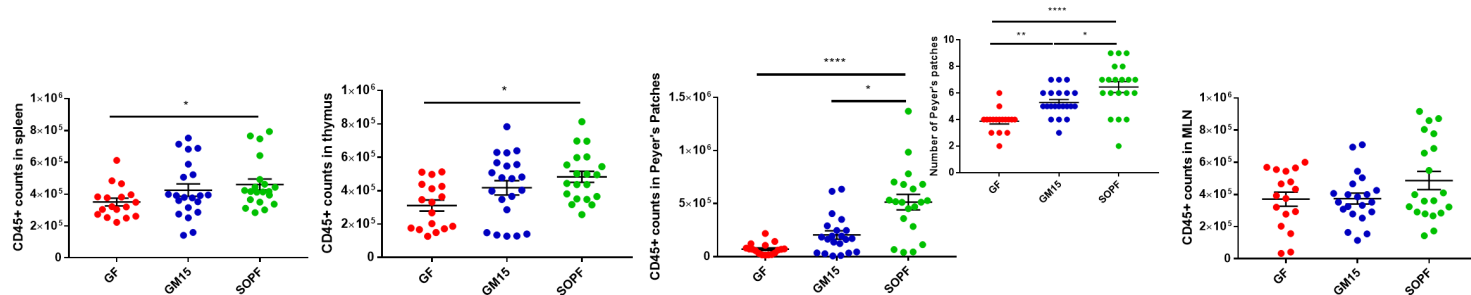

**a**

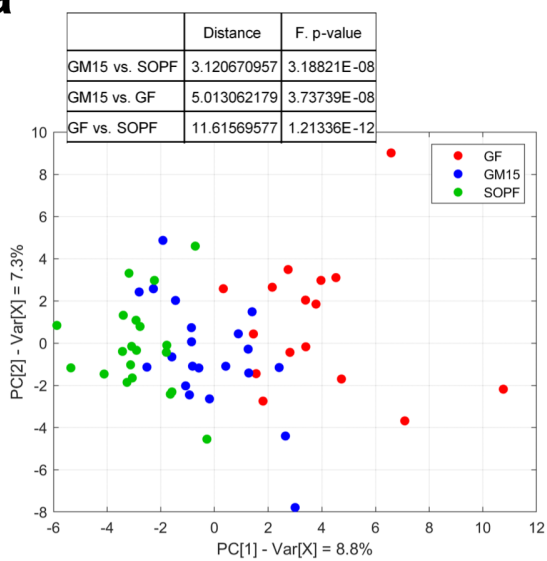

**b**

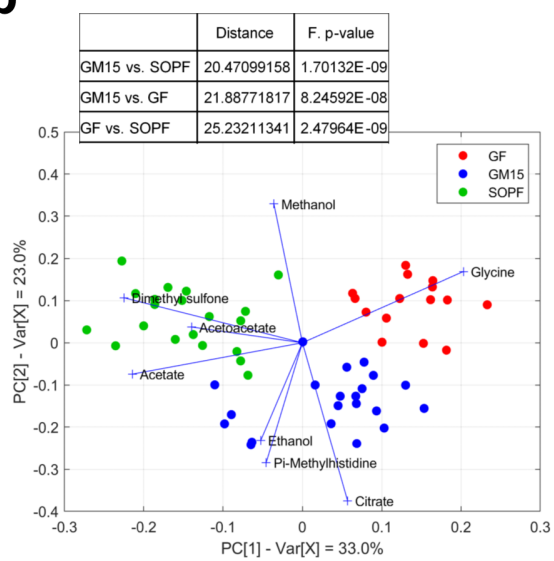

**c**

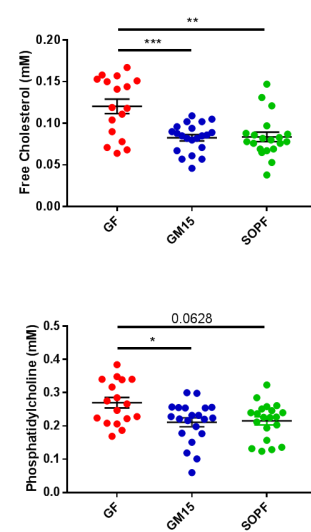

**d**

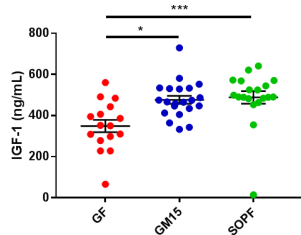

**e**

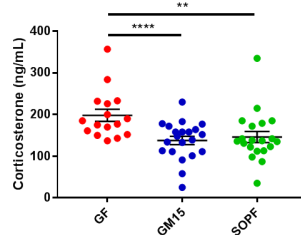

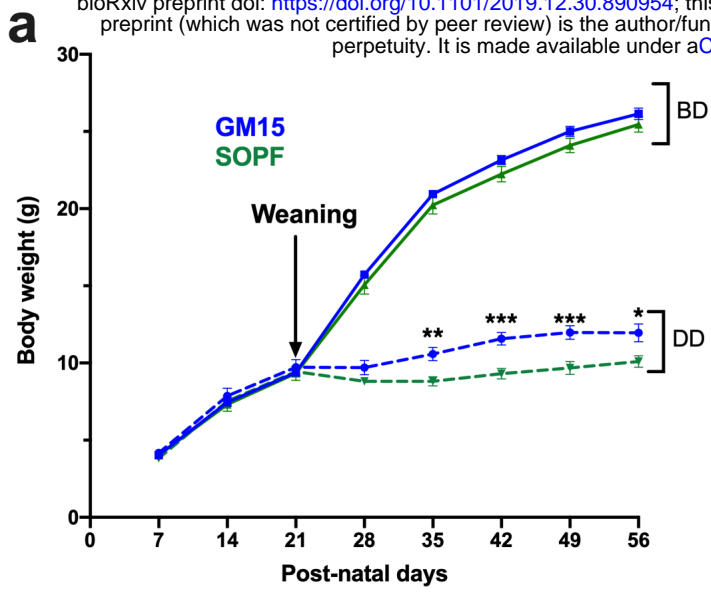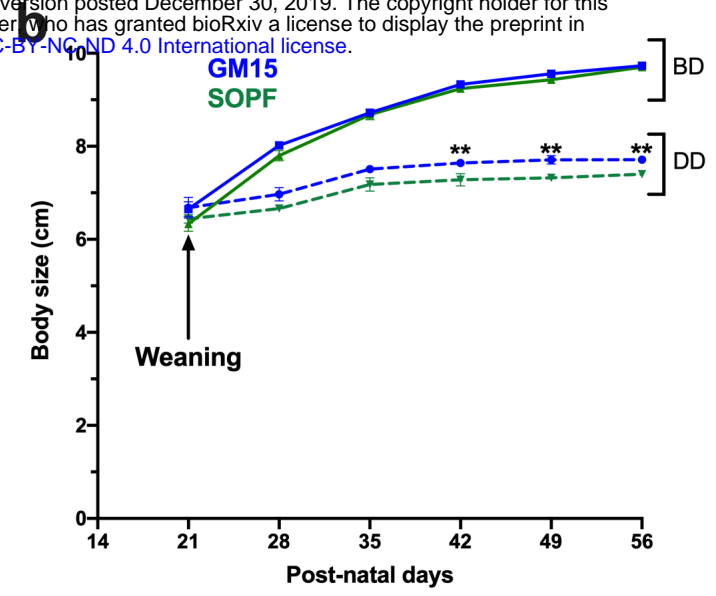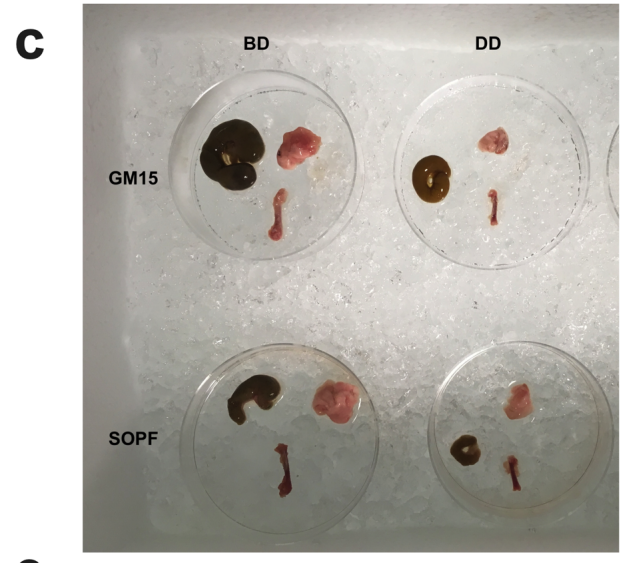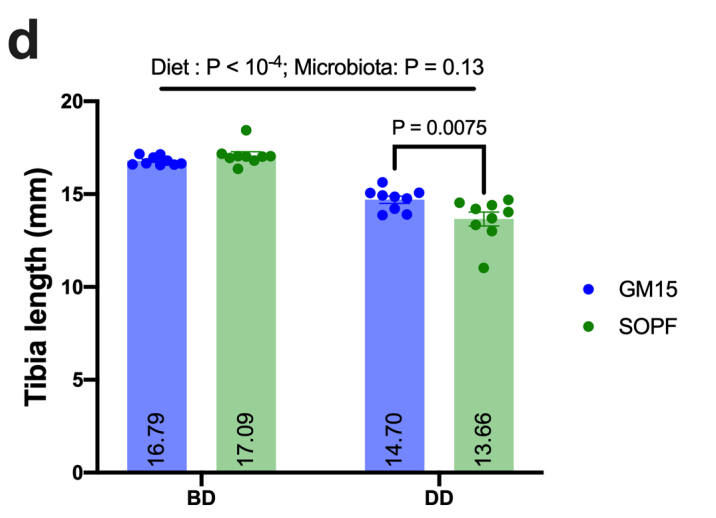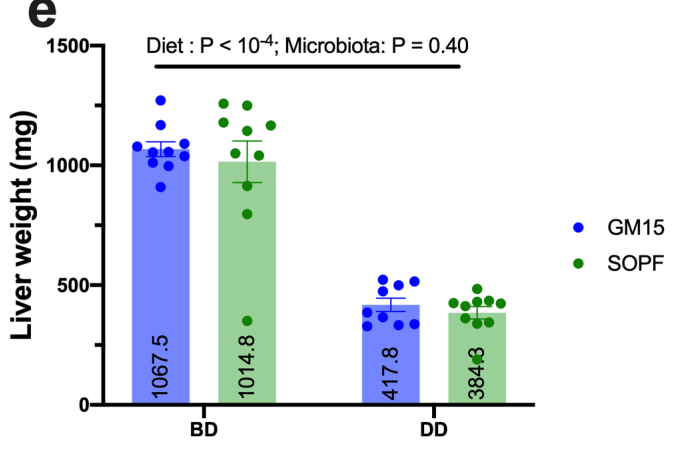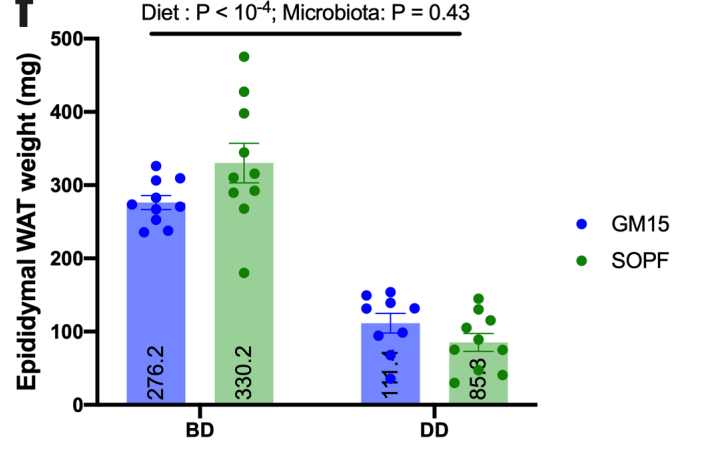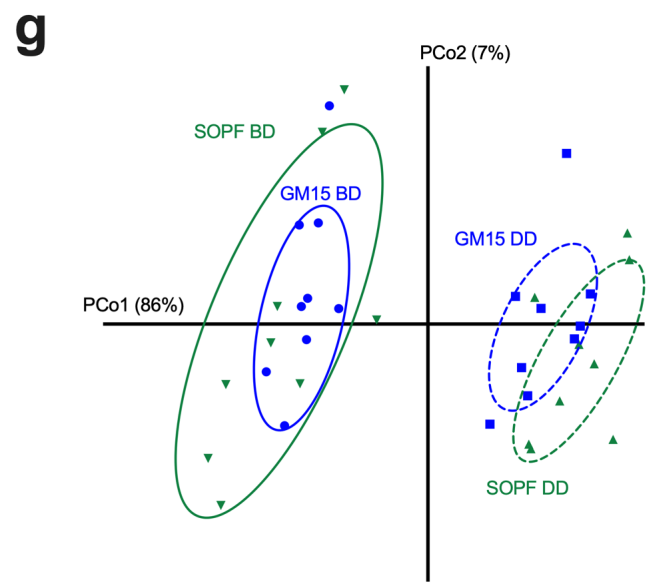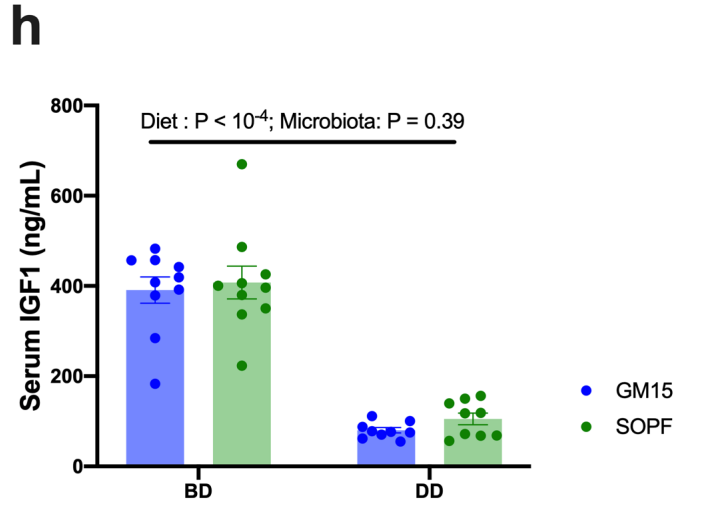

Source: https://www.biorxiv.org/content/biorxiv/early/2019/12/30/2019.12.30.890954.full.pdf
